# Supplementary material
Source: Research Square preprint supplement (doi:10.21203/rs.3.rs-9739280/v1)
Supplement: Supplementary file 1 [file 0f122bd156f148b17c918429.xlsx]

## Sheet: Indicator System
	Goal layer	Dimension	Indicators
	Marine economy HQD	Innovation	Internal R&D expenditure of marine research institutions (1,000 yuan)
			Number of R&D personnel in marine research institutions (persons)
			Number of scientific papers published by marine research institutions (papers)
			Number of patents granted to marine research institutions (items)
		Coordination	Proportion of marine tertiary industry (%)
			Ratio of marine tertiary industry output value to marine secondary industry output value
			Ratio of per capita disposable income of coastal urban to rural residents (%)
			Proportion of Gross Ocean Product (GOP) in regional GDP (%)
			GOP per capita (yuan/person)
		Green	Volume of wastewater directly discharged into the sea by coastal provinces (100 million tons)
			Area of marine nature reserves per capita (square kilometers per 10,000 people)
			CO₂ emissions per unit of GOP (10,000 tons per 100 million yuan)
			Solid waste generated per unit of GOP (10,000 tons per 100 million yuan)
			Direct economic losses caused by marine disasters (100 million yuan)
		Openness	Degree of openness (%)
			Proportion of foreign trade cargo throughput in total coastal port cargo throughput (%)
			International standard container throughput of coastal ports (10,000 TEU)
			Passenger throughput of coastal ports (10,000 persons)
			Number of coastal tourism agencies (units)
		Sharing	Marine fishing output per capita (tons/person)
			Per capita supply of marine aquatic products (tons/person)
			Number of undergraduate graduates in marine-related majors (persons)
			Number of full-time teachers in marine-related higher education institutions (persons)
			Number of master's graduates in marine-related majors (persons)

## Sheet: Indicator System Data
			Innovation				Coordination					Green					Openness					Sharing
id	province	year	Internal R&D expenditure of marine research institutions (1,000 yuan)	Number of R&D personnel in marine research institutions (persons)	Number of scientific papers published by marine research institutions (papers)	Number of patents granted to marine research institutions (items)	Proportion of marine tertiary industry (%)	Ratio of marine tertiary industry output value to marine secondary industry output value	Ratio of per capita disposable income of coastal urban to rural residents (%)	Proportion of Gross Ocean Product (GOP) in regional GDP (%)	GOP per capita (yuan/person)	Volume of wastewater directly discharged into the sea by coastal provinces (100 million tons)	Area of marine nature reserves per capita (square kilometers per 10,000 people)	CO₂ emissions per unit of GOP (10,000 tons per 100 million yuan)	Solid waste generated per unit of GOP (10,000 tons per 100 million yuan)	Direct economic losses caused by marine disasters (100 million yuan)	Degree of openness (%)	Proportion of foreign trade cargo throughput in total coastal port cargo throughput (%)	International standard container throughput of coastal ports (10,000 TEU)	Passenger throughput of coastal ports (10,000 persons)	Number of coastal tourism agencies (units)	Marine fishing output per capita (tons/person)	Per capita supply of marine aquatic products (tons/person)	Number of undergraduate graduates in marine-related majors (persons)	Number of full-time teachers in marine-related higher education institutions (persons)	Number of master's graduates in marine-related majors (persons)
1	Liaoning	2011	322016	696	446	168	0.437	0.375012	0.151	7639.87	1.01176	4.2	2.07976	1.43445	1.27596	2.13	0.279068	1200	704	1116	0.221702	0.0244723	0.0843246	1960	10714	335
1	Liaoning	2012	396628	865	478	252	0.473	0.373834	0.137	7752.46	1.1981	5.7	2.27872	1.3117	1.1019	4.49	0.264452	1514	662	1141	0.198877	0.0249431	0.08997	2100	11253	379
1	Liaoning	2013	634534	939	418	324	0.492	0.380605	0.138	8572.51	1.31147	5.9	2.28664	1.34603	0.986879	3. 24	0.261835	1798	631	1165	0.20112	0.0250292	0.0953386	2157	12630	404
1	Liaoning	2014	570547	822	442	474	0.533	0.384808	0.137	8988.07	1.47931	5.31	2.29783	1.29097	1.00263	0.15	0.244622	1860	608	1210	0.213751	0.0250759	0.10014	2157	13131	272
1	Liaoning	2015	1023051	1659	775	816	0.535	0.387361	0.155	8135.55	1.52697	4.91	2.30535	1.67122	1.42448	0.06	0.208447	1838	571	1253	0.228249	0.0259027	0.101001	2146	13720	370
1	Liaoning	2016	1068030	1601	609	211	0.516	0.391806	0.15	7715.05	1.44351	5.4806	2.40658	1.84567	1.02545	0.45	0.258435	1880	542	1258	0.22402	0.0254179	0.105046	2019	14303	372
1	Liaoning	2017	1119203	1630	578	235	0.545	0.39285	0.14	7616.19	1.71244	5.2534	1.73611	1.79212	1.17085	0.22	0.280449	1950	587	1246	0.235843	0.0130527	0.0926649	2159	14859	315
1	Liaoning	2018	1389880	1834	683	228	0.601	0.39248	0.124	7318.57	2.02425	4.8548	0.200858	1.667	0.89699	1.82	0.299566	1926	604	1517	0.266403	0.0124945	0.0874458	2239	15867	314
1	Liaoning	2019	1358390	1842	630	285	0.624	0.404958	0.137	8003.04	2.24265	4.2366	0.119884	1.72704	1.03296	1.26	0.291677	1689	619	1524	0.335725	0.00673532	0.0511524	1813	15463	342
1	Liaoning	2020	1563900	2289	513	243	0.593	0.432187	0.13	7687.66	1.97797	4.1691	0.119389	1.84276	1.01445	2.63357	0.260442	1311	241	1530	0.37636	0.00638732	0.0520242	2269	16267	357
1	Liaoning	2021	2957660	2375	521	409	0.562	0.446378	0.161	10524	1.57895	0.5814	0.118963	1.74718	0.890265	8.75091	0.279445	1135	265	1547	0.346003	0.00652237	0.0544772	2970	19016	514
1	Liaoning	2022	1793750	2353	580	333	0.533	0.452424	0.161	11083.9	1.39448	0.4744	0.118394	1.46581	0.912732	0	0.27545	1195	211	1593	0.327247	0.00630352	0.0549934	3355	26049	589
2	Hebei	2011	33325	258	555	1	0.397	0.399145	0.059	2006.91	0.708492	0.8	0.0459245	1.45347	1.83449	1.6	0.141214	77	6	1156	0.229369	0.0174956	0.0419836	110	10064	17
2	Hebei	2012	37411	251	448	6	0.416	0.403422	0.061	2233.54	0.769942	0.8	0.0995445	1.38806	1.71401	20.44	0.120105	90	4	1252	0.27657	0.0175031	0.0460813	211	10270	20
2	Hebei	2013	42408	249	426	7	0.432	0.413371	0.062	2389.96	0.825653	0.7	0.0455156	1.34755	1.54088	10.22	0.120163	135	5	1271	0.273982	0.0163503	0.0484397	230	12682	16
2	Hebei	2014	68450	268	494	4	0.472	0.421938	0.07	2801.72	0.96023	0.75	0.0463612	1.38738	1.43049	0	0.125017	184	4	1343	0.308643	0.0173243	0.0512246	211	14112	17
2	Hebei	2015	91209	293	421	4	0.5	0.422568	0.071	2896.8	1.07867	0.79	0.256525	1.19502	1.18034	0	0.107645	253	5	1360	0.337005	0.00259128	0.0528792	168	14509	4
2	Hebei	2016	71485	265	383	4	0.585	0.421926	0.062	2701.69	1.57771	0.6209	0.249637	1.12267	1.0342	9.35	0.0966721	305	5	1373	0.357526	0.0025529	0.0559113	253	18603	8
2	Hebei	2017	120784	296	345	3	0.617	0.421664	0.07	3219.73	1.77986	0.7123	0.243972	1.11808	0.960175	0.64	0.0935122	374	2	1382	0.317752	0.00240149	0.0575461	388	20643	12
2	Hebei	2018	621870	1088	543	30	0.639	0.425478	0.071	3431.86	1.96357	5.251	0.26522	1.09148	0.894291	1.68	0.0990505	426	2	1478	0.277658	0.00216505	0.0555098	429	23101	11
2	Hebei	2019	554980	1125	674	36	0.637	0.430158	0.075	3558.48	1.96529	3.135	0.263377	1.26757	0.926717	3.34	0.114063	413	1	1513	0.287899	0.00188929	0.00719752	463	22548	5
2	Hebei	2020	273820	752	610	30	0.597	0.44164	0.062	3025.86	1.74218	5.7237	0.262647	1.29792	0.935586	0	0.122819	447	0	1531	0.305955	0.00168826	0.00731356	460	26250	12
2	Hebei	2021	285050	890	661	64	0.554	0.456862	0.068	3683.94	1.41784	4.742	0.268794	1.15674	1.01361	0.91536	0.133866	481	0	1552	0.262536	0.00187712	0.00804047	907	23729	19
2	Hebei	2022	287340	823	616	77	0.544	0.469112	0.068	3838.14	1.38421	3.9131	0.274042	1.08207	0.885653	0	0.13079	498	0	1221	0.272341	0.00187557	0.00829128	1045	31743	24
3	Tianjin	2011	522200	1302	765	67	0.313	0.494288	0.311	26243.8	0.457061	0.4	0.0371443	1.9105	0.154843	0.1	0.590492	1159	25	332	0.488817	0.000201334	0.000376014	592	9905	25
3	Tianjin	2012	652666	1501	851	79	0.331	0.511284	0.306	28586.4	0.497068	0.4	0.0369798	1.77386	0.141379	0.04	0.566115	1230	29	344	0.510011	0.000194833	0.000413182	679	10332	38
3	Tianjin	2013	696242	1549	888	88	0.325	0.529779	0.317	32298.6	0.482663	0.5	0.0368356	1.76643	0.110823	0.02	0.553812	1301	33	383	0.534087	0.000628301	0.000776794	756	10688	68
3	Tianjin	2014	796171	1682	1038	96	0.376	0.540024	0.32	35214.8	0.604483	1.26	0.0366028	1.58696	0.110305	0	0.522947	1406	33	377	0.546146	0.000534915	0.00075765	847	11020	57
3	Tianjin	2015	895039	1775	886	121	0.428	0.541978	0.298	34214.7	0.750936	0.37	0.0363876	1.33206	0.0935733	0	0.430397	1411	52	400	0.552293	0.00189819	0.000909645	823	11222	65
3	Tianjin	2016	757931	1437	538	94	0.542	0.540986	0.226	28037.4	1.19259	0.8935	0.0394064	1.56816	0.0832314	0.8	0.381245	1452	79	396	0.539324	0.00181479	0.000831643	864	11484	81
3	Tianjin	2017	740290	1388	585	143	0.534	0.540096	0.251	32954.6	1.15112	0.7037	0.0391707	1.54057	0.0807808	0	0.410089	1507	97	475	0.560272	0.00110554	0.000576992	946	12879	79
3	Tianjin	2018	750640	1343	614	126	0.523	0.536695	0.267	36357.2	1.10104	0.1866	0.0356257	1.40198	0.0995104	0	0.431168	1601	76	476	0.544156	0.00109099	0.000576604	933	11228	78
3	Tianjin	2019	609030	1318	434	177	0.517	0.537826	0.374	38036.1	1.07286	0.3911	0.0355235	1.8789	0.139718	0.01	0.521611	1730	83	502	0.565664	0.000483878	0.000473255	819	11924	81
3	Tianjin	2020	670660	1298	523	235	0.51	0.539059	0.286	29011.5	1.04464	0.4918	0.0353173	1.75016	0.1236	0	0.520709	1835	4	516	0.566077	0.00047409	0.000507255	793	12583	95
3	Tianjin	2021	496990	1322	570	306	0.584	0.542963	0.33	37690.5	1.40812	0.5715	0.0352999	1.70887	0.122915	0	0.544935	2027	0	524	0.555614	0.000461999	0.000509477	1079	11850	115
3	Tianjin	2022	548200	1403	588	318	0.475	0.547478	0.344	40680.1	0.906781	0.5825	0.0353242	1.6166	0.120736	0	0.51384	2102	0	529	0.556082	0.000403973	0.000481891	1145	18951	187
4	Shandong	2011	1518322	2769	1879	213	0.439	0.387259	0.177	8307.29	0.890053	5.1	0.489958	0.684081	0.430598	12.16	0.335864	1691	1237	1865	0.555672	0.0598505	0.267916	1476	33476	370
4	Shandong	2012	1728892	2879	2023	280	0.442	0.388063	0.179	9241.97	0.907811	5.1	0.660661	0.752701	0.365948	34.92	0.309918	1899	1313	1963	0.552482	0.0588476	0.275764	1542	34188	419
4	Shandong	2013	1917428	2954	2094	370	0.452	0.397552	0.177	9948.9	0.954875	5.6	0.658079	0.676496	0.33173	1.44	0.301857	2076	1298	2001	0.555812	0.0569539	0.281037	1925	35016	398
4	Shandong	2014	1950815	3211	2275	437	0.479	0.406611	0.19	11509	1.062	5.88	0.681388	0.637873	0.323166	1.49	0.286256	2256	1321	2054	0.515292	0.0559745	0.301455	1658	36452	356
4	Shandong	2015	1801784	2471	2009	505	0.492	0.409891	0.197	12591	1.1064	6.12	0.679537	0.652406	0.313968	0.44	0.237864	2402	1378	2109	0.505566	0.055169	0.139084	1832	37763	331
4	Shandong	2016	1382895	3126	1945	370	0.51	0.410267	0.195	13316.4	1.18186	6.7796	0.757697	0.598162	0.330519	2.39	0.228838	2509	1353	2115	0.514378	0.0550875	0.139833	2072	39750	388
4	Shandong	2017	1551766	3206	2000	372	0.523	0.410938	0.195	14144.4	1.22782	6.4771	0.755203	0.571054	0.32876	0.26	0.24438	2560	1446	2220	0.527726	0.0417863	0.12745	2466	43375	296
4	Shandong	2018	2678690	5240	2917	607	0.528	0.412071	0.203	15383.6	1.23912	7.7735	0.123547	0.500795	0.39279	0.71	0.25303	2765	1461	2511	0.524946	0.0406469	0.124969	2343	46148	286
4	Shandong	2019	1986070	5117	3228	668	0.582	0.419925	0.189	13303.9	1.5831	8.2858	0.605688	0.654157	0.451645	21.63	0.288293	3010	1480	2613	0.551154	0.0143636	0.117996	2129	50076	289
4	Shandong	2020	2740550	7750	3314	874	0.586	0.428875	0.177	12702.2	1.67358	9.0547	0.594831	0.554038	0.342559	0.01941	0.302025	3191	637	2676	0.552146	0.0138996	0.118264	2205	52668	334
4	Shandong	2021	4111350	8163	3403	947	0.504	0.441805	0.183	14901.1	1.15591	9.2627	0.582925	0.495104	0.304711	2.70483	0.352195	3447	694	2734	0.558527	0.0139346	0.119984	3420	55720	730
4	Shandong	2022	4205190	8652	3712	1332	0.507	0.450765	0.185	15914.5	1.16855	9.4488	0.578435	0.514416	0.294958	11.9973	0.371449	3757	596	2864	0.522414	0.0136699	0.121512	3792	65731	851
5	Jiangsu	2011	583736	1536	1005	63	0.428	0.42018	0.087	5301.13	0.792599	0.3	0.335752	0.691577	0.214283	0.61	0.709637	488	14	1891	0.527039	0.0114032	0.0356677	1375	39027	318
5	Jiangsu	2012	494402	1597	1040	105	0.437	0.421168	0.087	5816.38	0.845933	0.3	0.290997	0.684844	0.188343	6.24	0.639867	504	12	1996	0.483076	0.0112788	0.0369771	1454	42194	367
5	Jiangsu	2013	649443	1695	969	99	0.46	0.428083	0.083	6007.32	0.930639	0.4	0.29088	0.634603	0.183093	0.29	0.576594	554	12	2073	0.46428	0.0109944	0.0371956	1412	43686	390
5	Jiangsu	2014	1060412	2070	1196	142	0.426	0.435509	0.086	6750.63	0.82195	0.37	0.292525	0.619615	0.168067	0.51	0.531861	511	9	2099	0.481899	0.010857	0.0366472	1383	39329	348
5	Jiangsu	2015	830532	1480	1132	181	0.43	0.437334	0.087	7338.18	0.853231	0.47	3.50395	0.536769	0.152578	0.58	0.484618	518	7	2160	0.429643	0.0622825	0.0358191	1433	42115	344
5	Jiangsu	2016	768831	1405	1118	136	0.436	0.438484	0.085	7882.83	0.875707	0.5146	0.101495	0.504951	0.149869	0.37	0.437133	490	5	2241	0.476584	0.0603134	0.0354025	1412	44335	327
5	Jiangsu	2017	823445	1218	1120	159	0.48	0.439182	0.081	8231.51	1.05225	0.4752	9.97597	0.481533	0.14022	4.63	0.464619	492	14	2364	0.48945	0.0576437	0.0355219	1638	50307	346
5	Jiangsu	2018	997520	1642	1574	209	0.48	0.441631	0.082	8944.71	1.04434	0.5244	0.0154499	0.459479	0.141354	0.94	0.474471	494	19	2835	0.437906	0.050766	0.033627	1420	50659	331
5	Jiangsu	2019	880620	1726	1680	212	0.467	0.44412	0.077	9117.25	0.981269	0.5535	0.00568087	0.392886	0.135723	0.37	0.435878	505	21	2943	0.471861	0.00424157	0.0117332	1350	50180	338
5	Jiangsu	2020	1282930	2338	1871	296	0.459	0.455689	0.08	9698.36	0.964025	0.607	0.00559947	0.425899	0.115505	0.191899	0.431662	507	1	3057	0.46898	0.00394298	0.0113369	1463	51023	362
5	Jiangsu	2021	1364280	2701	1816	315	0.551	0.46397	0.072	9903.23	1.32599	0.8556	0.00551053	0.355809	0.111568	6.02636	0.447347	541	0	3155	0.444514	0.00387842	0.0107593	3248	42492	495
5	Jiangsu	2022	1585120	2775	1958	386	0.558	0.473362	0.074	10573	1.36132	0.7548	0.00542005	0.345843	0.109141	1.06611	0.445746	609	0	3297	0.364457	0.00384507	0.0109509	3424	59267	579
6	Shanghai	2011	1284748	2392	1103	400	0.608	0.424418	0.293	23847.6	1.55585	1.6	0.248679	2.51288	0.127359	0.3	1.47223	3174	154	1010	0.541037	0.000186243	0.00262084	1025	11078	407
6	Shanghai	2012	1434100	2578	1223	435	0.621	0.424313	0.295	24786.6	1.64305	1.9	0.244988	2.30733	0.109084	0.06	1.36557	3253	130	1090	0.562049	0.000161494	0.0027908	1240	10726	358
6	Shanghai	2013	1763624	2727	1105	625	0.632	0.428005	0.292	25758.6	1.71864	1.9	0.242214	2.38023	0.0951379	0.03	1.26509	3362	134	1139	0.552283	0.000154833	0.00264215	1169	10440	411
6	Shanghai	2014	2163707	2659	1058	730	0.635	0.433898	0.265	25330.4	1.74078	1.93	0.23853	2.18928	0.0816242	0	1.21565	3529	178	1185	0.571019	0.000157581	0.00356394	884	9667	378
6	Shanghai	2015	2307215	3067	826	836	0.639	0.438144	0.269	27500.8	1.77288	2.41	0.236195	1.96498	0.0743364	0.05	1.11372	3654	225	1225	0.582334	0.000354399	0.00341222	1205	10735	355
6	Shanghai	2016	2150057	1839	1092	263	0.655	0.442349	0.265	30253.7	1.90109	2.5921	0.234313	1.78948	0.0596532	0	1.02248	3713	344	1261	0.589498	0.000349525	0.00282526	1093	11025	390
6	Shanghai	2017	1743318	1855	954	198	0.663	0.444517	0.277	34447.3	1.97376	2.4598	0.231488	1.84718	0.0531677	0	1.0668	4023	355	1382	0.581824	0.000302989	0.00287274	1160	17402	375
6	Shanghai	2018	2144920	2534	978	203	0.673	0.446468	0.281	37101	2.05742	2.464	0.00243665	1.81337	0.0548382	0.54	1.04421	4201	315	1691	0.587876	0.000278908	0.00330097	1166	16023	319
6	Shanghai	2019	2023600	2344	1027	183	0.692	0.450927	0.273	41944.4	2.24952	2.6504	0.00241721	1.51565	0.047903	0.03	0.892983	4330	230	1758	0.597791	0.000253871	0.021992	1176	18146	332
6	Shanghai	2020	4190300	5885	1622	389	0.695	0.456729	0.234	36461	2.28857	2.8245	0.00240327	1.56339	0.0466633	0	0.897976	4350	32	1808	0.596943	0.000215979	0.0176923	1211	16744	416
6	Shanghai	2021	4866440	6532	2098	595	0.728	0.467323	0.22	38655.3	2.67913	2.7597	0.00238834	1.41375	0.0473913	0.514739	0.938429	4703	20	1865	0.594197	0.000196784	0.0173287	1480	18473	746
6	Shanghai	2022	5046690	6545	2696	569	0.728	0.472773	0.202	36564	2.67925	2.204	0.00238777	1.386	0.0465202	0.007368	0.942664	4730	3	1884	0.596032	0.00019889	0.0147498	1593	23033	885
7	Zhejiang	2011	319300	614	497	41	0.477	0.46793	0.14	8145.06	1.07022	14.2	0.0591711	1.11963	0.13719	5.91	0.61828	1584	1062	1760	0.387693	0.320751	0.0391242	713	13480	139
7	Zhejiang	2012	337108	610	509	59	0.484	0.466998	0.143	8702.73	1.09952	16.1	0.0580282	1.03276	0.128951	42.67	0.568878	1759	834	1894	0.393661	0.312272	0.0407023	712	14427	170
7	Zhejiang	2013	331195	642	588	79	0.499	0.471791	0.14	9090.42	1.16088	16.9	0.0593856	0.92929	0.114483	28.23	0.553551	1910	719	1988	0.405006	0.312941	0.0416385	625	17328	153
7	Zhejiang	2014	391208	723	525	193	0.553	0.479613	0.135	9232.09	1.49948	17.57	0.0587949	0.987436	0.112756	4.37	0.542886	2136	705	2036	0.407129	0.315747	0.0435752	745	18173	166
7	Zhejiang	2015	556497	818	554	158	0.564	0.483255	0.14	10052.8	1.56658	18.3	0.0581312	0.864581	0.104385	11.25	0.503634	2257	698	2028	0.401919	0.0310348	0.0448926	898	18643	172
7	Zhejiang	2016	479554	898	519	126	0.577	0.48407	0.14	10865.9	1.66008	18.6329	0.227503	0.808197	0.0904487	2.42	0.473137	2362	666	2051	0.398785	0.0315541	0.0445741	1014	22207	208
7	Zhejiang	2017	549803	1028	579	169	0.614	0.486842	0.136	11412.3	1.96047	20.6877	0.184642	0.72535	0.086631	0.92	0.492865	2687	691	2216	0.397204	0.0276951	0.042293	1184	20558	255
7	Zhejiang	2018	721150	1355	723	229	0.633	0.491273	0.134	11994.1	2.13259	20.6736	0.0541993	0.770036	0.101873	5.88	0.509118	2898	630	2686	0.388178	0.02533	0.0408294	1242	20787	277
7	Zhejiang	2019	627080	1349	752	276	0.639	0.496428	0.131	12853.3	2.21175	21.4476	0.147368	0.714911	0.0914794	87.35	0.494802	3063	333	2769	0.395068	0.0236408	0.038505	1060	21395	242
7	Zhejiang	2020	819060	1549	710	254	0.62	0.509259	0.13	13024.4	2.02031	20.963	0.146144	0.694428	0.0708471	3.54827	0.521526	3219	266	2885	0.397456	0.0203471	0.0357177	1023	22453	294
7	Zhejiang	2021	1077970	1840	559	343	0.567	0.514652	0.133	15047.7	1.49042	20.2221	0.145001	0.65827	0.0718305	9.56797	0.562599	3489	276	3014	0.397087	0.0202506	0.0360316	1393	16543	375
7	Zhejiang	2022	1235340	2398	771	406	0.556	0.527095	0.133	15785.8	1.41412	21.9219	0.143816	0.560521	0.0705	2.80638	0.608691	3796	207	3181	0.383117	0.0203241	0.037561	1565	21537	424
8	Fujian	2011	220009	475	406	20	0.48	0.393114	0.244	11321.4	1.10214	11.2	0.204336	1.83132	0.251455	5.4	0.527889	970	1113	702	0.406958	0.0399616	0.109716	844	8116	123
8	Fujian	2012	255753	478	350	16	0.502	0.396257	0.228	11670.9	1.23944	16.1	0.137876	1.76134	0.392624	22.76	0.499629	1073	1115	760	0.403661	0.0398336	0.112981	968	9234	137
8	Fujian	2013	242596	790	331	13	0.507	0.404806	0.231	12942.1	1.25911	18.7	0.2162	1.75808	0.392129	45.08	0.481919	1169	1008	784	0.408224	0.0396581	0.117032	1026	13133	160
8	Fujian	2014	354156	762	304	20	0.535	0.411757	0.249	15158.9	1.39181	18.87	0.215772	1.62151	0.201313	4.3	0.453023	1271	980	805	0.42688	0.0400946	0.122493	1034	14423	183
8	Fujian	2015	366234	809	381	48	0.556	0.414515	0.272	17760	1.49973	18.9	206.464	1.5037	0.190518	30.79	0.404791	1364	1012	846	0.401217	0.0404016	0.128291	1148	14283	158
8	Fujian	2016	408332	808	412	35	0.57	0.416477	0.278	19919.6	1.599	19.6767	1.56264	1.46873	0.154616	16.21	0.361564	1440	973	844	0.400642	0.0406179	0.132554	1441	13092	184
8	Fujian	2017	500465	840	328	39	0.597	0.418835	0.292	23084.9	1.76295	15.6516	1.98696	1.17251	0.169947	1.27	0.357532	1565	890	897	0.391384	0.0346081	0.131519	1428	16993	159
8	Fujian	2018	560990	1065	384	57	0.611	0.423091	0.298	25974.4	1.86671	32.5424	0.549145	1.22398	0.171019	11.54	0.346371	1647	899	1128	0.376727	0.0337073	0.138066	1495	17125	158
8	Fujian	2019	506200	1010	422	74	0.624	0.428935	0.269	27578.7	1.96753	21.9589	0.333333	1.00723	0.149827	0.64	0.31423	1726	902	1181	0.399301	0.183764	0.825004	1452	19363	150
8	Fujian	2020	601190	821	337	52	0.612	0.442748	0.238	25141.3	1.89543	13.8637	0.329154	0.946968	0.137481	1.24032	0.319838	1720	276	1270	0.379032	0.172373	0.834837	1390	19894	170
8	Fujian	2021	550440	995	559	127	0.574	0.454224	0.219	25893.2	1.62807	18.9769	0.324074	0.948462	0.134632	0.497846	0.377359	1746	273	1336	0.375199	0.171076	0.846353	1683	16380	218
8	Fujian	2022	512030	1050	530	161	0.55	0.464296	0.216	26742.4	1.47766	19.3031	0.320774	0.885678	0.127635	0.141722	0.376629	1800	172	1472	0.360828	0.169568	0.844341	2027	22771	223
9	Guangdong	2011	858228	3128	1552	156	0.506	0.370221	0.173	8545.09	1.07946	6.9	0.39969	0.894388	0.110091	12.68	1.10879	4103	2358	1376	0.369036	0.153761	0.442671	597	14754	236
9	Guangdong	2012	1015391	3167	2104	246	0.494	0.370594	0.184	9515.99	1.01106	6.6	0.380498	0.821112	0.104472	17.47	1.08846	4256	2457	1512	0.370692	0.149255	0.427174	775	18741	242
9	Guangdong	2013	1118513	3281	1889	226	0.509	0.374716	0.182	10012.1	1.07206	7.1	0.358888	0.782447	0.0953556	74.41	1.08751	4420	2598	1656	0.359953	0.146159	0.433725	833	20796	227
9	Guangdong	2014	1408427	3597	2152	216	0.532	0.380926	0.195	11515.2	1.17368	6.94	0.35621	0.72866	0.0835003	60.41	0.975263	4752	2843	1792	0.351556	0.145439	0.438754	860	22562	172
9	Guangdong	2015	1778965	4465	2929	772	0.552	0.384383	0.198	12367.8	1.28001	6.12	0.352106	0.74803	0.0768936	28.77	0.874645	4915	2867	1901	0.339619	0.0138734	0.0423293	838	23842	188
9	Guangdong	2016	1966360	4619	3072	788	0.576	0.385097	0.198	13409.8	1.41423	6.703	0.308119	0.685196	0.0695582	9.63	0.784785	5094	2855	2028	0.343927	0.0134606	0.042402	929	25795	179
9	Guangdong	2017	2485862	3817	3072	988	0.6	0.385113	0.198	14599.3	1.56933	7.1487	0.30325	0.60658	0.070822	54.1	0.756073	5504	3061	2450	0.335239	0.012905	0.0404521	1487	33431	144
9	Guangdong	2018	3559940	5582	4052	1103	0.612	0.387181	0.199	15650.8	1.65064	8.4815	0.130354	0.587803	0.0938283	23.78	0.737716	5714	3275	3045	0.326078	0.0112075	0.0395884	1934	35020	167
9	Guangdong	2019	3170780	7334	4236	1210	0.696	0.39108	0.173	14883.7	2.49148	12.3669	0.127072	0.547798	0.0941029	0.03	0.664162	5976	2986	3281	0.341715	0.0103788	0.0395357	1370	37438	172
9	Guangdong	2020	5297820	8923	5947	978	0.712	0.4008	0.16	14028.8	2.72982	8.1563	0.11597	0.548213	0.0627355	0.491944	0.637705	6044	1697	3390	0.338647	0.00896484	0.035686	1524	40078	200
9	Guangdong	2021	6078460	9022	4460	1365	0.676	0.406643	0.137	13493	2.30359	9.1188	0.115421	0.514291	0.0632769	0.283812	0.663748	6429	1849	3592	0.364496	0.00888664	0.0358753	2352	38497	228
9	Guangdong	2022	5036950	9116	4792	1442	0.649	0.414691	0.139	14268.5	2.04284	10.6372	0.115667	0.454055	0.0648332	7.64825	0.648811	6490	1464	3754	0.360757	0.00888208	0.0362082	2915	52683	282
10	Guangxi	2011	26669	171	142	19	0.418	0.327032	0.052	1318.58	1.11188	0.8	0.0990312	2.83111	0.630143	1.15	0.128703	74	30	459	0.580914	0.0143225	0.0342949	92	8673	25
10	Guangxi	2012	40617	202	105	13	0.416	0.333349	0.058	1621.22	1.04871	0.9	0.0982486	2.86034	0.606977	5.33	0.142784	82	23	510	0.603108	0.0142376	0.0351986	136	9691	24
10	Guangxi	2013	38588	177	89	14	0.41	0.34347	0.063	1901.08	0.977978	3.7	0.02331	2.46133	0.537653	4.9	0.141402	100	20	513	0.6184	0.0137868	0.0362365	136	9930	20
10	Guangxi	2014	95296	382	190	33	0.462	0.35198	0.065	2140.88	1.26292	1.65	0.0231384	2.4684	0.511595	28.3	0.158926	112	20	537	0.632671	0.0136853	0.0366849	178	10248	19
10	Guangxi	2015	84997	413	167	47	0.48	0.358381	0.067	2349.2	1.34108	1.29	0.0229358	2.25578	0.413607	0.47	0.189377	142	20	539	0.613026	0.0135952	0.0374728	175	10919	15
10	Guangxi	2016	32587	167	69	10	0.49	0.365732	0.068	2575.66	1.41137	1.073	0.0351385	2.05859	0.377124	2.69	0.172705	179	18	586	0.593076	0.0134956	0.0387185	219	12505	13
10	Guangxi	2017	25098	134	58	23	0.505	0.371287	0.074	2806.2	1.50563	1.1901	3.47922	2.32084	0.349489	0.12	0.189384	228	23	598	0.549081	0.0125027	0.0392835	280	14887	14
10	Guangxi	2018	386900	546	1179	40	0.523	0.38337	0.074	3035.58	1.61592	1.0109	0.0223305	1.9482	0.481392	0.85	0.202569	290	28	819	0.543108	0.0113493	0.0394681	246	14451	13
10	Guangxi	2019	185120	550	1056	34	0.552	0.393611	0.076	3236.65	1.84599	1.9827	0.0322581	2.18739	0.48442	2.33	0.221606	382	25	850	0.538642	0.0111052	0.0402201	344	14701	19
10	Guangxi	2020	171280	555	1035	88	0.55	0.413146	0.072	3183.3	1.75715	1.976	0.0318789	2.11877	0.406935	0.0325	0.219193	505	6	922	0.467684	0.00964451	0.0400279	466	16583	11
10	Guangxi	2021	199670	646	894	118	0.608	0.424682	0.087	4376.81	2.11092	2.0177	0.0317649	1.85291	0.370381	0.7336	0.239119	601	9	963	0.466026	0.00951787	0.0413993	736	17452	24
10	Guangxi	2022	306420	785	610	129	0.614	0.439085	0.09	4657.02	2.16127	1.6472	0.031702	1.80026	0.393712	0.448334	0.245507	702	4	1036	0.451231	0.00943937	0.042636	921	17996	40
11	Hainan	2011	8930	35	56	5	0.599	0.378801	0.259	7342.7	3.01231	1.9	28.5029	12.8931	0.166757	20.03	0.326595	112	1297	295	0.184136	0.119761	0.141391	115	3604	22
11	Hainan	2012	110	4	69	5	0.592	0.382275	0.264	8273.63	3.0816	2.1	28.1815	11.647	0.135249	0.83	0.316607	137	1297	311	0.186733	0.125065	0.14938	101	3677	24
11	Hainan	2013	1073.67	11.3333	63	2	0.567	0.392754	0.281	9603.26	2.92469	2.4	27.9296	11.4131	0.131958	5.89	0.294959	142	1322	352	0.184905	0.125281	0.152961	103	3732	28
11	Hainan	2014	2037.33	18.6667	78	6	0.578	0.404827	0.258	9637.82	2.89395	2.58	27.3832	11.169	0.14741	36.61	0.278346	162	1361	352	0.183352	0.135115	0.165006	120	3967	29
11	Hainan	2015	3001	26	97	8	0.588	0.411975	0.271	10631.7	2.98636	2.77	27.4391	9.82203	0.113827	0.33	0.234938	154	1328	363	0.193137	0.149366	0.1778	114	3968	19
11	Hainan	2016	16918	143	57	2	0.574	0.41623	0.284	12013.6	2.94817	2.7761	27.2846	10.2053	0.0816289	5.69	0.185976	165	1363	304	0.187797	0.153488	0.183991	145	4538	24
11	Hainan	2017	17654	62	89	8	0.608	0.418665	0.288	13233.5	3.29196	2.8446	27.0194	9.9245	0.0979222	1.82	0.156869	209	1503	272	0.181833	0.121742	0.156469	139	4660	19
11	Hainan	2018	532810	668	363	33	0.622	0.419473	0.299	14737.3	3.47299	2.8798	25.8672	7.95623	0.101237	0.03	0.174383	240	1524	440	0.175418	0.116047	0.147548	115	4874	21
11	Hainan	2019	366750	580	417	71	0.671	0.419607	0.297	15824.1	4.17549	3.1003	67.6825	7.76418	0.114876	0.04	0.170909	268	1526	483	0.180503	0.114229	0.14291	282	5319	22
11	Hainan	2020	1086840	810	463	55	0.685	0.438823	0.289	15796.4	4.60084	3.4696	63.1828	8.62553	0.129079	0.158	0.169436	300	1184	600	0.192058	0.100258	0.126581	402	5440	23
11	Hainan	2021	733190	2083	470	129	0.789	0.449506	0.306	19504.9	11.971	3.6705	62.6873	6.84591	0.101178	0.713302	0.227863	334	1265	703	0.184705	0.0981144	0.124879	467	5261	71
11	Hainan	2022	667690	2766	345	156	0.733	0.476519	0.328	22027.3	5.87708	4.133	62.26	6.82893	0.103553	0	0.296145	392	1191	830	0.202595	0.0991163	0.124686	639	8300	83

## Sheet: Dependent Variable
id	province	year	Entropy Weight Method Score	HQD	Entropy Weight-PCA Game Theory Combined Weight	New_HQD
1	Liaoning	2011	0.131031	-2.03232	0.165835	-1.79676
1	Liaoning	2012	0.140709	-1.96106	0.175886	-1.73792
1	Liaoning	2013	0.15174	-1.88559	0.187793	-1.67242
1	Liaoning	2014	0.15388	-1.87158	0.189939	-1.66105
1	Liaoning	2015	0.182156	-1.70289	0.215644	-1.53413
1	Liaoning	2016	0.156416	-1.85524	0.193162	-1.64423
1	Liaoning	2017	0.153714	-1.87266	0.190088	-1.66027
1	Liaoning	2018	0.161264	-1.82471	0.200552	-1.60668
1	Liaoning	2019	0.160074	-1.83212	0.198031	-1.61933
1	Liaoning	2020	0.155706	-1.85979	0.194908	-1.63523
1	Liaoning	2021	0.192037	-1.65007	0.234726	-1.44934
1	Liaoning	2022	0.188212	-1.67019	0.233647	-1.45394
2	Hebei	2011	0.0449069	-3.10316	0.0722214	-2.62802
2	Hebei	2012	0.0489096	-3.01778	0.076223	-2.57409
2	Hebei	2013	0.0520551	-2.95545	0.081563	-2.50638
2	Hebei	2014	0.0592679	-2.82569	0.0908425	-2.39863
2	Hebei	2015	0.0578293	-2.85026	0.0912088	-2.3946
2	Hebei	2016	0.0633716	-2.75874	0.0979666	-2.32313
2	Hebei	2017	0.0672285	-2.69966	0.103462	-2.26855
2	Hebei	2018	0.0794589	-2.53252	0.113492	-2.17602
2	Hebei	2019	0.0772443	-2.56078	0.111914	-2.19003
2	Hebei	2020	0.0732973	-2.61323	0.106717	-2.23758
2	Hebei	2021	0.077614	-2.55601	0.111604	-2.1928
2	Hebei	2022	0.081526	-2.50683	0.116993	-2.14565
3	Tianjin	2011	0.123162	-2.09426	0.161277	-1.82463
3	Tianjin	2012	0.131522	-2.02858	0.170034	-1.77176
3	Tianjin	2013	0.141266	-1.95711	0.180196	-1.71371
3	Tianjin	2014	0.14916	-1.90274	0.188179	-1.67036
3	Tianjin	2015	0.148656	-1.90612	0.188623	-1.668
3	Tianjin	2016	0.134609	-2.00538	0.174981	-1.74308
3	Tianjin	2017	0.146195	-1.92281	0.186937	-1.67698
3	Tianjin	2018	0.148183	-1.9093	0.188826	-1.66693
3	Tianjin	2019	0.160931	-1.82678	0.201849	-1.60023
3	Tianjin	2020	0.149968	-1.89733	0.190347	-1.65891
3	Tianjin	2021	0.168908	-1.7784	0.210212	-1.55964
3	Tianjin	2022	0.177919	-1.72643	0.219304	-1.51729
4	Shandong	2011	0.237542	-1.43741	0.280046	-1.2728
4	Shandong	2012	0.250979	-1.38238	0.29237	-1.22973
4	Shandong	2013	0.262833	-1.33624	0.307664	-1.17875
4	Shandong	2014	0.270294	-1.30824	0.314359	-1.15722
4	Shandong	2015	0.255226	-1.36561	0.298592	-1.20868
4	Shandong	2016	0.255544	-1.36436	0.300045	-1.20382
4	Shandong	2017	0.259093	-1.35057	0.305008	-1.18742
4	Shandong	2018	0.298992	-1.20734	0.343267	-1.06925
4	Shandong	2019	0.29408	-1.2239	0.336303	-1.08974
4	Shandong	2020	0.309986	-1.17123	0.353945	-1.03862
4	Shandong	2021	0.361095	-1.01862	0.408475	-0.895325
4	Shandong	2022	0.396877	-0.924128	0.444142	-0.811611
5	Jiangsu	2011	0.143115	-1.94411	0.187112	-1.67605
5	Jiangsu	2012	0.147147	-1.91632	0.191428	-1.65324
5	Jiangsu	2013	0.149102	-1.90313	0.194124	-1.63926
5	Jiangsu	2014	0.153394	-1.87475	0.197782	-1.62059
5	Jiangsu	2015	0.166586	-1.79224	0.209742	-1.56188
5	Jiangsu	2016	0.161318	-1.82438	0.205979	-1.57998
5	Jiangsu	2017	0.180992	-1.7093	0.223948	-1.49634
5	Jiangsu	2018	0.17754	-1.72856	0.223022	-1.50048
5	Jiangsu	2019	0.163971	-1.80806	0.209915	-1.56105
5	Jiangsu	2020	0.178811	-1.72143	0.224991	-1.49169
5	Jiangsu	2021	0.200242	-1.60823	0.251043	-1.38213
5	Jiangsu	2022	0.219436	-1.5167	0.271739	-1.30291
6	Shanghai	2011	0.217843	-1.52398	0.258488	-1.35291
6	Shanghai	2012	0.222085	-1.5047	0.263466	-1.33383
6	Shanghai	2013	0.233633	-1.454	0.274648	-1.29226
6	Shanghai	2014	0.2365	-1.44181	0.276255	-1.28643
6	Shanghai	2015	0.246936	-1.39863	0.287271	-1.24733
6	Shanghai	2016	0.223037	-1.50042	0.265081	-1.32772
6	Shanghai	2017	0.227615	-1.4801	0.270555	-1.30728
6	Shanghai	2018	0.236577	-1.44148	0.279666	-1.27416
6	Shanghai	2019	0.23826	-1.43439	0.281936	-1.26608
6	Shanghai	2020	0.278429	-1.27859	0.32125	-1.13554
6	Shanghai	2021	0.323067	-1.1299	0.366898	-1.00267
6	Shanghai	2022	0.334638	-1.09471	0.379774	-0.968178
7	Zhejiang	2011	0.218147	-1.52258	0.248697	-1.39152
7	Zhejiang	2012	0.214918	-1.5375	0.242022	-1.41873
7	Zhejiang	2013	0.217117	-1.52732	0.245098	-1.4061
7	Zhejiang	2014	0.22893	-1.47434	0.25891	-1.35127
7	Zhejiang	2015	0.156136	-1.85703	0.188393	-1.66923
7	Zhejiang	2016	0.159589	-1.83516	0.193286	-1.64359
7	Zhejiang	2017	0.170261	-1.77042	0.203755	-1.59084
7	Zhejiang	2018	0.182375	-1.70169	0.216086	-1.53208
7	Zhejiang	2019	0.174536	-1.74562	0.200601	-1.60644
7	Zhejiang	2020	0.180783	-1.71046	0.214252	-1.5406
7	Zhejiang	2021	0.194341	-1.63814	0.228208	-1.4775
7	Zhejiang	2022	0.211862	-1.55182	0.246003	-1.40241
8	Fujian	2011	0.138975	-1.97346	0.173549	-1.7513
8	Fujian	2012	0.139813	-1.96745	0.169937	-1.77233
8	Fujian	2013	0.143894	-1.93868	0.171286	-1.76442
8	Fujian	2014	0.153447	-1.8744	0.185756	-1.68332
8	Fujian	2015	0.386035	-0.951827	0.361465	-1.01759
8	Fujian	2016	0.165984	-1.79587	0.198214	-1.61841
8	Fujian	2017	0.170422	-1.76948	0.206139	-1.5792
8	Fujian	2018	0.175194	-1.74186	0.201374	-1.60259
8	Fujian	2019	0.280763	-1.27024	0.317408	-1.14757
8	Fujian	2020	0.261132	-1.34273	0.302048	-1.19717
8	Fujian	2021	0.269282	-1.312	0.307527	-1.17919
8	Fujian	2022	0.274657	-1.29223	0.313769	-1.1591
9	Guangdong	2011	0.295641	-1.21861	0.334186	-1.09606
9	Guangdong	2012	0.311038	-1.16784	0.34996	-1.04994
9	Guangdong	2013	0.314564	-1.15657	0.349169	-1.0522
9	Guangdong	2014	0.32808	-1.1145	0.364709	-1.00865
9	Guangdong	2015	0.296275	-1.21647	0.333108	-1.09929
9	Guangdong	2016	0.303495	-1.19239	0.342369	-1.07187
9	Guangdong	2017	0.328351	-1.11367	0.364876	-1.0082
9	Guangdong	2018	0.374358	-0.982544	0.414245	-0.881299
9	Guangdong	2019	0.379514	-0.968865	0.418641	-0.870741
9	Guangdong	2020	0.384494	-0.955828	0.426727	-0.85161
9	Guangdong	2021	0.408431	-0.895433	0.450938	-0.796425
9	Guangdong	2022	0.412344	-0.885898	0.455925	-0.785427
10	Guangxi	2011	0.0488917	-3.01815	0.0841464	-2.4752
10	Guangxi	2012	0.0518032	-2.9603	0.0871563	-2.44005
10	Guangxi	2013	0.0529168	-2.93903	0.0872397	-2.4391
10	Guangxi	2014	0.0597432	-2.8177	0.0938887	-2.36565
10	Guangxi	2015	0.0627805	-2.76811	0.0999006	-2.30358
10	Guangxi	2016	0.0604944	-2.8052	0.0981058	-2.32171
10	Guangxi	2017	0.0665712	-2.70948	0.103695	-2.2663
10	Guangxi	2018	0.0795937	-2.53082	0.116989	-2.14567
10	Guangxi	2019	0.0806713	-2.51737	0.117904	-2.13788
10	Guangxi	2020	0.0823881	-2.49631	0.1202	-2.11859
10	Guangxi	2021	0.0926945	-2.37845	0.131775	-2.02666
10	Guangxi	2022	0.097192	-2.33107	0.136929	-1.98829
11	Hainan	2011	0.15746	-1.84859	0.185254	-1.68603
11	Hainan	2012	0.161647	-1.82234	0.191141	-1.65475
11	Hainan	2013	0.164179	-1.8068	0.193273	-1.64365
11	Hainan	2014	0.166467	-1.79296	0.192911	-1.64553
11	Hainan	2015	0.174061	-1.74835	0.203743	-1.5909
11	Hainan	2016	0.177239	-1.73026	0.206841	-1.5758
11	Hainan	2017	0.170954	-1.76636	0.200984	-1.60453
11	Hainan	2018	0.18324	-1.69696	0.213682	-1.54327
11	Hainan	2019	0.234077	-1.4521	0.253645	-1.37182
11	Hainan	2020	0.227249	-1.48171	0.247794	-1.39516
11	Hainan	2021	0.264587	-1.32959	0.283725	-1.25975
11	Hainan	2022	0.261421	-1.34163	0.283036	-1.26218

## Sheet: Heterogeneity Analysis
id	province	year	Financial Development Level	Provincial Average	Median	Median Grouping of Financial Development Level (DEV)	Marketization Index	Provincial Average	Median	Median Grouping of Marketization Index (MIN)	Marine Fixed Asset Investment (100 million yuan)	Provincial Average	Median	Median Grouping of Marine Investment (INV)
1	Liaoning	2011	2.41439	3.61629	3.57308	1	8.161	8.858	9.4601	0	1383.78	1620.26	2975.45	0
1	Liaoning	2012	2.47959	3.61629	3.57308	1	8.052	8.858	9.4601	0	1497.56	1620.26	2975.45	0
1	Liaoning	2013	2.5534	3.61629	3.57308	1	8.486	8.858	9.4601	0	1751.04	1620.26	2975.45	0
1	Liaoning	2014	2.62263	3.61629	3.57308	1	8.625	8.858	9.4601	0	1913.34	1620.26	2975.45	0
1	Liaoning	2015	2.93142	3.61629	3.57308	1	8.575	8.858	9.4601	0	1747.38	1620.26	2975.45	0
1	Liaoning	2016	4.06254	3.61629	3.57308	1	8.217	8.858	9.4601	0	1631.54	1620.26	2975.45	0
1	Liaoning	2017	3.98998	3.61629	3.57308	1	8.506	8.858	9.4601	0	1530.57	1620.26	2975.45	0
1	Liaoning	2018	4.10822	3.61629	3.57308	1	8.753	8.858	9.4601	0	1403.15	1620.26	2975.45	0
1	Liaoning	2019	4.50753	3.61629	3.57308	1	9.252	8.858	9.4601	0	1495.72	1620.26	2975.45	0
1	Liaoning	2020	4.78587	3.61629	3.57308	1	9.564	8.858	9.4601	0	1426.05	1620.26	2975.45	0
1	Liaoning	2021	4.4638	3.61629	3.57308	1	9.886	8.858	9.4601	0	1793.41	1620.26	2975.45	0
1	Liaoning	2022	4.47614	3.61629	3.57308	1	10.219	8.858	9.4601	0	1869.64	1620.26	2975.45	0
2	Hebei	2011	1.9665	3.00321	3.57308	0	6.406	7.72733	9.4601	0	600.333	983.694	2975.45	0
2	Hebei	2012	2.09125	3.00321	3.57308	0	6.622	7.72733	9.4601	0	716.171	983.694	2975.45	0
2	Hebei	2013	2.2567	3.00321	3.57308	0	6.859	7.72733	9.4601	0	815.083	983.694	2975.45	0
2	Hebei	2014	2.44098	3.00321	3.57308	0	6.969	7.72733	9.4601	0	1002.2	983.694	2975.45	0
2	Hebei	2015	2.73555	3.00321	3.57308	0	7.592	7.72733	9.4601	0	1053.47	983.694	2975.45	0
2	Hebei	2016	2.89567	3.00321	3.57308	0	7.201	7.72733	9.4601	0	973.802	983.694	2975.45	0
2	Hebei	2017	2.88529	3.00321	3.57308	0	7.637	7.72733	9.4601	0	1111.77	983.694	2975.45	0
2	Hebei	2018	3.17577	3.00321	3.57308	0	8.104	7.72733	9.4601	0	1138.69	983.694	2975.45	0
2	Hebei	2019	3.59876	3.00321	3.57308	0	8.493	7.72733	9.4601	0	1157.98	983.694	2975.45	0
2	Hebei	2020	3.92987	3.00321	3.57308	0	8.717	7.72733	9.4601	0	984.602	983.694	2975.45	0
2	Hebei	2021	3.88654	3.00321	3.57308	0	8.946	7.72733	9.4601	0	1105.64	983.694	2975.45	0
2	Hebei	2022	4.17564	3.00321	3.57308	0	9.182	7.72733	9.4601	0	1144.59	983.694	2975.45	0
3	Tianjin	2011	2.96372	3.78772	3.57308	1	9.328	10.2153	9.4601	1	1455.67	2081.78	2975.45	0
3	Tianjin	2012	3.00069	3.78772	3.57308	1	10.07	10.2153	9.4601	1	1739.3	2081.78	2975.45	0
3	Tianjin	2013	3.06012	3.78772	3.57308	1	10.937	10.2153	9.4601	1	2131.11	2081.78	2975.45	0
3	Tianjin	2014	3.05216	3.78772	3.57308	1	11.015	10.2153	9.4601	1	2458.08	2081.78	2975.45	0
3	Tianjin	2015	3.27388	3.78772	3.57308	1	10.459	10.2153	9.4601	1	2437.72	2081.78	2975.45	0
3	Tianjin	2016	3.28878	3.78772	3.57308	1	10.303	10.2153	9.4601	1	1977.32	2081.78	2975.45	0
3	Tianjin	2017	3.36338	3.78772	3.57308	1	10.281	10.2153	9.4601	1	2165.57	2081.78	2975.45	0
3	Tianjin	2018	3.45929	3.78772	3.57308	1	10.402	10.2153	9.4601	1	2246.63	2081.78	2975.45	0
3	Tianjin	2019	4.81627	3.78772	3.57308	1	9.417	10.2153	9.4601	1	2301.98	2081.78	2975.45	0
3	Tianjin	2020	5.1836	3.78772	3.57308	1	9.762	10.2153	9.4601	1	1754.24	2081.78	2975.45	0
3	Tianjin	2021	4.9033	3.78772	3.57308	1	10.12	10.2153	9.4601	1	2085.27	2081.78	2975.45	0
3	Tianjin	2022	5.08745	3.78772	3.57308	1	10.49	10.2153	9.4601	1	2228.46	2081.78	2975.45	0
4	Shandong	2011	1.85458	2.3618	3.57308	0	8.668	9.757	9.4601	1	3320.98	5635.51	2975.45	1
4	Shandong	2012	1.86322	2.3618	3.57308	0	8.908	9.757	9.4601	1	3961.5	5635.51	2975.45	1
4	Shandong	2013	2.0355	2.3618	3.57308	0	9.233	9.757	9.4601	1	4537.38	5635.51	2975.45	1
4	Shandong	2014	2.06665	2.3618	3.57308	0	9.477	9.757	9.4601	1	5513.86	5635.51	2975.45	1
4	Shandong	2015	2.15641	2.3618	3.57308	0	9.728	9.757	9.4601	1	6150.53	5635.51	2975.45	1
4	Shandong	2016	2.21872	2.3618	3.57308	0	9.191	9.757	9.4601	1	6490.58	5635.51	2975.45	1
4	Shandong	2017	2.22753	2.3618	3.57308	0	9.494	9.757	9.4601	1	6613.82	5635.51	2975.45	1
4	Shandong	2018	2.27833	2.3618	3.57308	0	9.732	9.757	9.4601	1	6926.44	5635.51	2975.45	1
4	Shandong	2019	2.68849	2.3618	3.57308	0	10.104	9.757	9.4601	1	5875.09	5635.51	2975.45	1
4	Shandong	2020	2.95683	2.3618	3.57308	0	10.468	9.757	9.4601	1	5628.95	5635.51	2975.45	1
4	Shandong	2021	2.90649	2.3618	3.57308	0	10.845	9.757	9.4601	1	6106.6	5635.51	2975.45	1
4	Shandong	2022	3.08881	2.3618	3.57308	0	11.236	9.757	9.4601	1	6500.42	5635.51	2975.45	1
5	Jiangsu	2011	2.34811	2.83362	3.57308	0	10.428	10.9016	9.4601	1	1759.18	2975.45	2975.45	0
5	Jiangsu	2012	2.50289	2.83362	3.57308	0	10.597	10.9016	9.4601	1	2085.33	2975.45	2975.45	0
5	Jiangsu	2013	2.57828	2.83362	3.57308	0	10.76	10.9016	9.4601	1	2302.9	2975.45	2975.45	0
5	Jiangsu	2014	2.58758	2.83362	3.57308	0	10.733	10.9016	9.4601	1	2730.65	2975.45	2975.45	0
5	Jiangsu	2015	2.66328	2.83362	3.57308	0	10.578	10.9016	9.4601	1	3021.07	2975.45	2975.45	0
5	Jiangsu	2016	2.82386	2.83362	3.57308	0	9.639	10.9016	9.4601	1	3228.87	2975.45	2975.45	0
5	Jiangsu	2017	2.77975	2.83362	3.57308	0	9.656	10.9016	9.4601	1	3231.34	2975.45	2975.45	0
5	Jiangsu	2018	2.8299	2.83362	3.57308	0	9.746	10.9016	9.4601	1	3375.49	2975.45	2975.45	0
5	Jiangsu	2019	2.9336	2.83362	3.57308	0	11.494	10.9016	9.4601	1	3374.06	2975.45	2975.45	0
5	Jiangsu	2020	3.257	2.83362	3.57308	0	11.934	10.9016	9.4601	1	3584.11	2975.45	2975.45	0
5	Jiangsu	2021	3.236	2.83362	3.57308	0	12.39	10.9016	9.4601	1	3394	2975.45	2975.45	0
5	Jiangsu	2022	3.46319	2.83362	3.57308	0	12.864	10.9016	9.4601	1	3618.34	2975.45	2975.45	0
6	Shanghai	2011	4.96899	5.79056	3.57308	1	10.318	11.1252	9.4601	1	2323.94	3502.1	2975.45	1
6	Shanghai	2012	5.17982	5.79056	3.57308	1	10.068	11.1252	9.4601	1	2625.5	3502.1	2975.45	1
6	Shanghai	2013	5.2594	5.79056	3.57308	1	10.275	11.1252	9.4601	1	2950.78	3502.1	2975.45	1
6	Shanghai	2014	5.16802	5.79056	3.57308	1	10.766	11.1252	9.4601	1	3052.46	3502.1	2975.45	1
6	Shanghai	2015	6.25503	5.79056	3.57308	1	11.113	11.1252	9.4601	1	3346.86	3502.1	2975.45	1
6	Shanghai	2016	6.05044	5.79056	3.57308	1	11.225	11.1252	9.4601	1	3647.71	3502.1	2975.45	1
6	Shanghai	2017	5.96152	5.79056	3.57308	1	11.233	11.1252	9.4601	1	3958.99	3502.1	2975.45	1
6	Shanghai	2018	5.94815	5.79056	3.57308	1	11.379	11.1252	9.4601	1	4102.8	3502.1	2975.45	1
6	Shanghai	2019	5.57362	5.79056	3.57308	1	11.104	11.1252	9.4601	1	4547.34	3502.1	2975.45	1
6	Shanghai	2020	6.21459	5.79056	3.57308	1	11.544	11.1252	9.4601	1	3954.76	3502.1	2975.45	1
6	Shanghai	2021	6.29096	5.79056	3.57308	1	12.001	11.1252	9.4601	1	3876.99	3502.1	2975.45	1
6	Shanghai	2022	6.6162	5.79056	3.57308	1	12.476	11.1252	9.4601	1	3637.11	3502.1	2975.45	1
7	Zhejiang	2011	3.53145	4.02535	3.57308	1	9.666	10.6168	9.4601	1	1876.53	3118	2975.45	1
7	Zhejiang	2012	3.64019	4.02535	3.57308	1	9.86	10.6168	9.4601	1	2184.5	3118	2975.45	1
7	Zhejiang	2013	3.7018	4.02535	3.57308	1	10.053	10.6168	9.4601	1	2460.46	3118	2975.45	1
7	Zhejiang	2014	3.74886	4.02535	3.57308	1	10.335	10.6168	9.4601	1	2656.16	3118	2975.45	1
7	Zhejiang	2015	3.88859	4.02535	3.57308	1	10.492	10.6168	9.4601	1	2978.94	3118	2975.45	1
7	Zhejiang	2016	3.83766	4.02535	3.57308	1	10.43	10.6168	9.4601	1	3224.57	3118	2975.45	1
7	Zhejiang	2017	3.81612	4.02535	3.57308	1	10.56	10.6168	9.4601	1	3281.67	3118	2975.45	1
7	Zhejiang	2018	3.9555	4.02535	3.57308	1	10.802	10.6168	9.4601	1	3361.73	3118	2975.45	1
7	Zhejiang	2019	4.05841	4.02535	3.57308	1	10.827	10.6168	9.4601	1	3580.57	3118	2975.45	1
7	Zhejiang	2020	4.5787	4.02535	3.57308	1	11.137	10.6168	9.4601	1	3672.56	3118	2975.45	1
7	Zhejiang	2021	4.57823	4.02535	3.57308	1	11.456	10.6168	9.4601	1	3965.6	3118	2975.45	1
7	Zhejiang	2022	4.96874	4.02535	3.57308	1	11.784	10.6168	9.4601	1	4172.73	3118	2975.45	1
8	Fujian	2011	2.28297	2.58191	3.57308	0	9.019	10.0559	9.4601	1	1771.96	3665.9	2975.45	1
8	Fujian	2012	2.4102	2.58191	3.57308	0	9.237	10.0559	9.4601	1	1979.32	3665.9	2975.45	1
8	Fujian	2013	2.52312	2.58191	3.57308	0	9.376	10.0559	9.4601	1	2352.87	3665.9	2975.45	1
8	Fujian	2014	2.57359	2.58191	3.57308	0	9.622	10.0559	9.4601	1	2921.15	3665.9	2975.45	1
8	Fujian	2015	2.71518	2.58191	3.57308	0	10.297	10.0559	9.4601	1	3503.27	3665.9	2975.45	1
8	Fujian	2016	2.71686	2.58191	3.57308	0	10.052	10.0559	9.4601	1	3909.72	3665.9	2975.45	1
8	Fujian	2017	2.66226	2.58191	3.57308	0	10.209	10.0559	9.4601	1	4373.45	3665.9	2975.45	1
8	Fujian	2018	2.57838	2.58191	3.57308	0	10.263	10.0559	9.4601	1	4762.91	3665.9	2975.45	1
8	Fujian	2019	2.4172	2.58191	3.57308	0	10.153	10.0559	9.4601	1	4985.58	3665.9	2975.45	1
8	Fujian	2020	2.64775	2.58191	3.57308	0	10.477	10.0559	9.4601	1	4560.65	3665.9	2975.45	1
8	Fujian	2021	2.66308	2.58191	3.57308	0	10.811	10.0559	9.4601	1	4368.68	3665.9	2975.45	1
8	Fujian	2022	2.79235	2.58191	3.57308	0	11.155	10.0559	9.4601	1	4501.25	3665.9	2975.45	1
9	Guangdong	2011	2.82286	3.57308	3.57308	0	9.888	10.9108	9.4601	1	3801.66	6836.02	2975.45	1
9	Guangdong	2012	3.01705	3.57308	3.57308	0	9.936	10.9108	9.4601	1	4639.04	6836.02	2975.45	1
9	Guangdong	2013	3.14248	3.57308	3.57308	0	10.237	10.9108	9.4601	1	5280.21	6836.02	2975.45	1
9	Guangdong	2014	3.13824	3.57308	3.57308	0	10.445	10.9108	9.4601	1	6462.37	6836.02	2975.45	1
9	Guangdong	2015	3.51656	3.57308	3.57308	0	11.076	10.9108	9.4601	1	7151.07	6836.02	2975.45	1
9	Guangdong	2016	3.59604	3.57308	3.57308	0	10.49	10.9108	9.4601	1	7804.3	6836.02	2975.45	1
9	Guangdong	2017	3.56665	3.57308	3.57308	0	10.61	10.9108	9.4601	1	8260.81	6836.02	2975.45	1
9	Guangdong	2018	3.63105	3.57308	3.57308	0	10.854	10.9108	9.4601	1	8634.8	6836.02	2975.45	1
9	Guangdong	2019	3.71919	3.57308	3.57308	0	11.342	10.9108	9.4601	1	8122.58	6836.02	2975.45	1
9	Guangdong	2020	4.18305	3.57308	3.57308	0	11.673	10.9108	9.4601	1	7720.7	6836.02	2975.45	1
9	Guangdong	2021	4.14412	3.57308	3.57308	0	12.014	10.9108	9.4601	1	6896.44	6836.02	2975.45	1
9	Guangdong	2022	4.39968	3.57308	3.57308	0	12.364	10.9108	9.4601	1	7258.3	6836.02	2975.45	1
10	Guangxi	2011	2.06251	2.62148	3.57308	0	6.451	7.45442	9.4601	0	253.882	602.289	2975.45	0
10	Guangxi	2012	2.17276	2.62148	3.57308	0	6.759	7.45442	9.4601	0	336.009	602.289	2975.45	0
10	Guangxi	2013	2.25911	2.62148	3.57308	0	7.534	7.45442	9.4601	0	420.878	602.289	2975.45	0
10	Guangxi	2014	2.32054	2.62148	3.57308	0	7.769	7.45442	9.4601	0	498.827	602.289	2975.45	0
10	Guangxi	2015	2.43484	2.62148	3.57308	0	7.606	7.45442	9.4601	0	559.584	602.289	2975.45	0
10	Guangxi	2016	2.5177	2.62148	3.57308	0	7.515	7.45442	9.4601	0	611.406	602.289	2975.45	0
10	Guangxi	2017	2.50663	2.62148	3.57308	0	7.719	7.45442	9.4601	0	641.756	602.289	2975.45	0
10	Guangxi	2018	2.77499	2.62148	3.57308	0	7.799	7.45442	9.4601	0	670.969	602.289	2975.45	0
10	Guangxi	2019	2.92617	2.62148	3.57308	0	7.27	7.45442	9.4601	0	704.622	602.289	2975.45	0
10	Guangxi	2020	3.1531	2.62148	3.57308	0	7.47	7.45442	9.4601	0	696.524	602.289	2975.45	0
10	Guangxi	2021	3.10137	2.62148	3.57308	0	7.675	7.45442	9.4601	0	888.363	602.289	2975.45	0
10	Guangxi	2022	3.22811	2.62148	3.57308	0	7.886	7.45442	9.4601	0	944.645	602.289	2975.45	0
11	Hainan	2011	3.05199	3.58667	3.57308	1	6.195	6.43875	9.4601	0	270.303	571.507	2975.45	0
11	Hainan	2012	3.15153	3.58667	3.57308	1	6.522	6.43875	9.4601	0	332.432	571.507	2975.45	0
11	Hainan	2013	3.36355	3.58667	3.57308	1	7.083	6.43875	9.4601	0	413.438	571.507	2975.45	0
11	Hainan	2014	3.37627	3.58667	3.57308	1	7.143	6.43875	9.4601	0	440.65	571.507	2975.45	0
11	Hainan	2015	3.85872	3.58667	3.57308	1	6.593	6.43875	9.4601	0	497.447	571.507	2975.45	0
11	Hainan	2016	4.1468	3.58667	3.57308	1	6.2	6.43875	9.4601	0	561.897	571.507	2975.45	0
11	Hainan	2017	4.15809	3.58667	3.57308	1	6.502	6.43875	9.4601	0	599.485	571.507	2975.45	0
11	Hainan	2018	3.81424	3.58667	3.57308	1	6.715	6.43875	9.4601	0	646.618	571.507	2975.45	0
11	Hainan	2019	3.62763	3.58667	3.57308	1	5.943	6.43875	9.4601	0	688.017	571.507	2975.45	0
11	Hainan	2020	3.66825	3.58667	3.57308	1	6.032	6.43875	9.4601	0	696.916	571.507	2975.45	0
11	Hainan	2021	3.3892	3.58667	3.57308	1	6.123	6.43875	9.4601	0	801.687	571.507	2975.45	0
11	Hainan	2022	3.43373	3.58667	3.57308	1	6.214	6.43875	9.4601	0	909.196	571.507	2975.45	0

## Sheet: Independent Variable
id	province	year	Digital Inclusive Finance Index
1	Liaoning	2011	60.58
1	Liaoning	2012	122.96
1	Liaoning	2013	175.26
1	Liaoning	2014	200.16
1	Liaoning	2015	237.53
1	Liaoning	2016	245.84
1	Liaoning	2017	284.03
1	Liaoning	2018	316.88
1	Liaoning	2019	344.11
1	Liaoning	2020	361.46
1	Liaoning	2021	379.23
1	Liaoning	2022	397.91
2	Hebei	2011	32.42
2	Hebei	2012	89.32
2	Hebei	2013	144.98
2	Hebei	2014	160.76
2	Hebei	2015	199.53
2	Hebei	2016	214.36
2	Hebei	2017	258.17
2	Hebei	2018	282.77
2	Hebei	2019	305.06
2	Hebei	2020	322.7
2	Hebei	2021	340.99
2	Hebei	2022	359.67
3	Tianjin	2011	43.29
3	Tianjin	2012	103.53
3	Tianjin	2013	160.07
3	Tianjin	2014	187.61
3	Tianjin	2015	226.4
3	Tianjin	2016	231.41
3	Tianjin	2017	267.18
3	Tianjin	2018	290.95
3	Tianjin	2019	311.01
3	Tianjin	2020	326.29
3	Tianjin	2021	342.2
3	Tianjin	2022	358.26
4	Shandong	2011	80.19
4	Shandong	2012	150.77
4	Shandong	2013	222.14
4	Shandong	2014	239.53
4	Shandong	2015	278.11
4	Shandong	2016	282.22
4	Shandong	2017	336.65
4	Shandong	2018	377.73
4	Shandong	2019	410.28
4	Shandong	2020	431.93
4	Shandong	2021	453.75
4	Shandong	2022	475.79
5	Jiangsu	2011	62.08
5	Jiangsu	2012	122.03
5	Jiangsu	2013	180.98
5	Jiangsu	2014	204.16
5	Jiangsu	2015	244.01
5	Jiangsu	2016	253.75
5	Jiangsu	2017	297.69
5	Jiangsu	2018	334.02
5	Jiangsu	2019	361.93
5	Jiangsu	2020	381.61
5	Jiangsu	2021	401.38
5	Jiangsu	2022	421.17
6	Shanghai	2011	77.39
6	Shanghai	2012	146.35
6	Shanghai	2013	205.77
6	Shanghai	2014	224.45
6	Shanghai	2015	264.85
6	Shanghai	2016	268.1
6	Shanghai	2017	318.05
6	Shanghai	2018	357.45
6	Shanghai	2019	387.49
6	Shanghai	2020	406.88
6	Shanghai	2021	426.85
6	Shanghai	2022	447.19
7	Zhejiang	2011	61.76
7	Zhejiang	2012	123.21
7	Zhejiang	2013	183.1
7	Zhejiang	2014	202.59
7	Zhejiang	2015	245.21
7	Zhejiang	2016	252.67
7	Zhejiang	2017	299.28
7	Zhejiang	2018	334.44
7	Zhejiang	2019	360.51
7	Zhejiang	2020	380.13
7	Zhejiang	2021	400.26
7	Zhejiang	2022	420.96
8	Fujian	2011	38.55
8	Fujian	2012	100.35
8	Fujian	2013	159.3
8	Fujian	2014	181.88
8	Fujian	2015	220.66
8	Fujian	2016	232.57
8	Fujian	2017	272.06
8	Fujian	2018	301.13
8	Fujian	2019	327.36
8	Fujian	2020	347.81
8	Fujian	2021	368.44
8	Fujian	2022	389.83
9	Guangdong	2011	69.48
9	Guangdong	2012	127.06
9	Guangdong	2013	184.78
9	Guangdong	2014	201.53
9	Guangdong	2015	240.95
9	Guangdong	2016	248
9	Guangdong	2017	296.17
9	Guangdong	2018	331.92
9	Guangdong	2019	360.61
9	Guangdong	2020	379.53
9	Guangdong	2021	398.84
9	Guangdong	2022	418.34
10	Guangxi	2011	33.89
10	Guangxi	2012	89.35
10	Guangxi	2013	141.46
10	Guangxi	2014	166.12
10	Guangxi	2015	207.23
10	Guangxi	2016	223.32
10	Guangxi	2017	261.94
10	Guangxi	2018	289.25
10	Guangxi	2019	309.91
10	Guangxi	2020	325.17
10	Guangxi	2021	340.66
10	Guangxi	2022	357.15
11	Hainan	2011	45.56
11	Hainan	2012	102.94
11	Hainan	2013	158.26
11	Hainan	2014	179.62
11	Hainan	2015	230.33
11	Hainan	2016	231.56
11	Hainan	2017	275.64
11	Hainan	2018	309.72
11	Hainan	2019	328.75
11	Hainan	2020	344.05
11	Hainan	2021	359.83
11	Hainan	2022	375.98

## Sheet: Mediating Variable
id	Province	Year	Primary Industry (100 million yuan)	Secondary Industry (100 million yuan)	Tertiary Industry (100 million yuan)	Share of Primary Industry	Share of Secondary Industry	Share of Tertiary Industry	cosθ1	cosθ2	cosθ3	θ1	θ2	θ3	Marine Industrial Structure Upgrading (Angle Cosine Method)
1	Liaoning	2011	437.1	1445.7	1462.7	0.130653	0.432133	0.437214	0.207893	0.687603	0.695689	1.36138	0.812614	0.801418	6.51077
1	Liaoning	2012	447	1339.7	1605.1	0.131788	0.394982	0.47323	0.209076	0.62662	0.750756	1.36017	0.893588	0.721591	6.58927
1	Liaoning	2013	499.6	1402.7	1839.6	0.133515	0.374863	0.491622	0.211095	0.59268	0.777283	1.3581	0.936414	0.680461	6.62759
1	Liaoning	2014	418.7	1411	2087.3	0.106893	0.360225	0.532882	0.163937	0.552461	0.817259	1.40612	0.985483	0.614159	6.80347
1	Liaoning	2015	404.1	1236.7	1888.4	0.114502	0.350419	0.535079	0.176216	0.539289	0.823477	1.39365	1.0012	0.603283	6.78665
1	Liaoning	2016	424.9	1192.3	1721.1	0.12728	0.357158	0.515562	0.198884	0.558082	0.805599	1.37058	0.978723	0.634111	6.70329
1	Liaoning	2017	449.6	1045	1789.5	0.136902	0.3182	0.544898	0.212027	0.492811	0.843909	1.35715	1.05548	0.566268	6.74867
1	Liaoning	2018	322.4	931.8	1886.2	0.102662	0.296714	0.600624	0.151478	0.437801	0.88622	1.41873	1.11765	0.481676	6.97317
1	Liaoning	2019	333.3	952.8	2136.8	0.0973736	0.27836	0.624266	0.141036	0.403178	0.904188	1.42929	1.15581	0.441321	7.04081
1	Liaoning	2020	351.5	980.4	1939.2	0.107456	0.299716	0.592828	0.159686	0.445396	0.880978	1.41042	1.10918	0.49287	6.9425
1	Liaoning	2021	365.8	1583.9	2500.9	0.0821912	0.355885	0.561924	0.122637	0.531013	0.838443	1.44785	1.011	0.576377	6.94193
1	Liaoning	2022	393.8	1778.3	2479.8	0.0846536	0.382274	0.533073	0.127989	0.577966	0.805961	1.44246	0.954562	0.633499	6.86999
2	Hebei	2011	61.1	813.7	576.5	0.0421002	0.56067	0.39723	0.0611553	0.814436	0.577022	1.5096	0.61904	0.955719	6.72261
2	Hebei	2012	70.9	876.3	674.7	0.0437142	0.540292	0.415994	0.0639765	0.790728	0.608815	1.50678	0.658798	0.91623	6.75416
2	Hebei	2013	77.9	911.4	752.5	0.0447238	0.523252	0.432024	0.0657677	0.769457	0.635304	1.50498	0.692806	0.882394	6.78295
2	Hebei	2014	75.2	1008.3	968.2	0.0366525	0.491446	0.471901	0.0537179	0.720263	0.691618	1.51705	0.766615	0.807069	6.89146
2	Hebei	2015	77.3	986.4	1064	0.0363303	0.463599	0.50007	0.0532022	0.678896	0.732305	1.51757	0.824539	0.749096	6.95088
2	Hebei	2016	88.6	738.6	1165.3	0.0444668	0.37069	0.584843	0.0640868	0.53425	0.842894	1.50667	1.00718	0.568158	7.10251
2	Hebei	2017	86	827.2	1472.3	0.0360511	0.346762	0.617187	0.0508589	0.489192	0.870692	1.51992	1.05963	0.514188	7.1932
2	Hebei	2018	91.7	829	1627.8	0.035982	0.325289	0.638729	0.0501356	0.453244	0.889976	1.52064	1.1004	0.473504	7.23621
2	Hebei	2019	103.9	858.6	1687.4	0.039209	0.324012	0.636779	0.0547958	0.452817	0.889918	1.51597	1.10087	0.473631	7.2233
2	Hebei	2020	136.6	773.8	1348.1	0.0604826	0.342617	0.596901	0.0875425	0.495903	0.863954	1.48314	1.05192	0.527727	7.08099
2	Hebei	2021	152.7	1071.7	1519.5	0.0556507	0.390575	0.553774	0.0818471	0.574431	0.814451	1.48886	0.958888	0.619014	7.00336
2	Hebei	2022	178.3	1119.7	1549.9	0.0626075	0.393167	0.544226	0.0928481	0.583074	0.807096	1.47781	0.94829	0.631579	6.9616
3	Tianjin	2011	7.2	2410.4	1101.7	0.00204586	0.684909	0.313045	0.00271673	0.909499	0.415697	1.56808	0.428718	1.14209	6.70376
3	Tianjin	2012	7.9	2626	1305.3	0.00200548	0.666633	0.331362	0.00269392	0.895472	0.44511	1.5681	0.461306	1.1095	6.73642
3	Tianjin	2013	8.7	3065.7	1479.7	0.00191037	0.673174	0.324916	0.00255572	0.900582	0.434678	1.56824	0.449689	1.12112	6.72522
3	Tianjin	2014	14.6	3127.3	1890.4	0.00290126	0.621445	0.375653	0.0039953	0.855789	0.51731	1.5668	0.543723	1.02709	6.81494
3	Tianjin	2015	15.2	2803.3	2105.1	0.00308717	0.56936	0.427553	0.00433575	0.799633	0.600473	1.56646	0.644113	0.926703	6.91431
3	Tianjin	2016	14.5	1838.6	2192.7	0.00358396	0.454447	0.541969	0.00506715	0.642514	0.766257	1.56573	0.873022	0.697801	7.14103
3	Tianjin	2017	10.5	2155.2	2480.9	0.00225972	0.463823	0.533917	0.00319507	0.655811	0.754919	1.5676	0.85554	0.715266	7.12915
3	Tianjin	2018	10.7	2388.1	2629.4	0.002128	0.474941	0.522931	0.00301237	0.672321	0.740254	1.56778	0.833457	0.737349	7.10761
3	Tianjin	2019	10.2	2536.5	2721.3	0.00193622	0.481492	0.516572	0.00274184	0.68183	0.731506	1.56805	0.820535	0.750269	7.0955
3	Tianjin	2020	6.8	1964.7	2052.4	0.0016899	0.488258	0.510052	0.00239335	0.691503	0.72237	1.5684	0.807229	0.763573	7.08324
3	Tianjin	2021	9.1	2145.2	3020.7	0.00175845	0.414531	0.58371	0.00245618	0.57901	0.815316	1.56834	0.953282	0.617521	7.22911
3	Tianjin	2022	5.5	2905	2634.2	0.000991938	0.523924	0.475084	0.00140253	0.74079	0.671735	1.56939	0.73655	0.834248	7.01553
4	Shandong	2011	540.9	3961.9	3526.3	0.0673675	0.493443	0.43919	0.101455	0.743123	0.661419	1.46917	0.733071	0.848087	6.72173
4	Shandong	2012	648.7	4362.8	3960.6	0.0723019	0.486263	0.441435	0.10943	0.735965	0.668117	1.46115	0.743706	0.839121	6.70997
4	Shandong	2013	715.7	4593.9	4386.6	0.0738124	0.473784	0.452404	0.111967	0.718689	0.686258	1.45859	0.768882	0.814465	6.72801
4	Shandong	2014	794.5	5089	5404.5	0.0703845	0.450833	0.478783	0.106419	0.681644	0.723904	1.46418	0.820789	0.761353	6.79546
4	Shandong	2015	790	5522.4	6110	0.0635948	0.444552	0.491853	0.095484	0.667469	0.73849	1.47517	0.839991	0.739968	6.84545
4	Shandong	2016	776.8	5730.7	6772.9	0.0584922	0.431516	0.509992	0.0872223	0.643466	0.760489	1.48346	0.871778	0.706731	6.90068
4	Shandong	2017	720	6046.8	7424.4	0.0507357	0.426095	0.523169	0.0749821	0.629725	0.773191	1.49574	0.889597	0.686939	6.95336
4	Shandong	2018	723	6600.4	8178.7	0.0466388	0.425775	0.527587	0.0686306	0.626541	0.776361	1.50211	0.893689	0.681925	6.97564
4	Shandong	2019	684.9	4939.8	7820.2	0.0509412	0.367411	0.581648	0.0738434	0.532591	0.843145	1.49689	1.00914	0.56769	7.07662
4	Shandong	2020	828.3	4519.6	7563.9	0.0641506	0.350036	0.585813	0.0935915	0.51068	0.854662	1.47707	1.03482	0.545897	7.04674
4	Shandong	2021	896.4	6613.4	7644.5	0.0591515	0.436404	0.504444	0.0883339	0.651704	0.753312	1.48235	0.860967	0.717713	6.88669
4	Shandong	2022	945.7	7022.3	8205.9	0.0584707	0.434175	0.507354	0.0872275	0.647708	0.756879	1.48346	0.866224	0.712272	6.89509
5	Jiangsu	2011	135.6	2297	1820.6	0.0318819	0.540064	0.428054	0.0462146	0.782853	0.620488	1.52457	0.671559	0.901431	6.81824
5	Jiangsu	2012	220.4	2439.2	2063.4	0.0466653	0.516451	0.436883	0.0688216	0.761659	0.644313	1.50192	0.704926	0.870672	6.78629
5	Jiangsu	2013	225.6	2432.2	2263.5	0.0458415	0.494219	0.459939	0.0677446	0.730357	0.679698	1.503	0.751952	0.823445	6.83635
5	Jiangsu	2014	316.2	2894.7	2379.3	0.0565633	0.517817	0.42562	0.0840876	0.769792	0.632731	1.48661	0.69228	0.885721	6.73011
5	Jiangsu	2015	409.5	3071.5	2620.7	0.0671124	0.503384	0.429503	0.100904	0.756842	0.645762	1.46972	0.712328	0.868776	6.70259
5	Jiangsu	2016	434.5	3290.6	2881.6	0.0657666	0.49807	0.436163	0.098851	0.748629	0.655579	1.47178	0.724805	0.855847	6.72081
5	Jiangsu	2017	440.7	3163.7	3329	0.0635619	0.456298	0.48014	0.0955216	0.685731	0.72156	1.47513	0.815189	0.764744	6.82051
5	Jiangsu	2018	454	3473.4	3627.4	0.0600942	0.459761	0.480145	0.0900314	0.6888	0.719339	1.48064	0.810964	0.767946	6.8318
5	Jiangsu	2019	433.7	3678.3	3609.4	0.0561686	0.476377	0.467454	0.0838614	0.711246	0.697923	1.48684	0.779527	0.798303	6.81787
5	Jiangsu	2020	540.1	3911	3770.3	0.0656944	0.47571	0.458596	0.098934	0.716406	0.690633	1.4717	0.772159	0.808432	6.76785
5	Jiangsu	2021	281.6	3500.1	4641.1	0.0334331	0.415551	0.551016	0.0483867	0.601415	0.79747	1.52239	0.925526	0.647705	7.06593
5	Jiangsu	2022	294.6	3687.9	5020.4	0.0327228	0.409635	0.557643	0.0472393	0.591357	0.805025	1.52354	0.938055	0.635079	7.08181
6	Shanghai	2011	3.8	2196.8	3417.9	0.000676337	0.390994	0.60833	0.000935269	0.540684	0.841225	1.56986	0.999546	0.571251	7.27993
6	Shanghai	2012	4.2	2248.2	3693.9	0.000706322	0.378084	0.62121	0.000971262	0.519903	0.854225	1.56983	1.02406	0.546738	7.30433
6	Shanghai	2013	3.9	2318	3983.8	0.000618488	0.367604	0.631778	0.000846152	0.502918	0.864334	1.56995	1.04382	0.526972	7.32447
6	Shanghai	2014	4.3	2278.4	3966.2	0.000688121	0.364608	0.634704	0.000940087	0.498115	0.86711	1.56986	1.04937	0.521425	7.32974
6	Shanghai	2015	4.4	2436.2	4319.1	0.000650916	0.360401	0.638948	0.000887311	0.491288	0.870997	1.56991	1.05723	0.513569	7.33775
6	Shanghai	2016	4.4	2571.1	4887.9	0.000589544	0.344494	0.654916	0.000796687	0.465537	0.885028	1.57	1.08656	0.484242	7.36735
6	Shanghai	2017	4.9	2854.9	5634.9	0.00057683	0.33608	0.663343	0.000775703	0.45195	0.892043	1.57002	1.10185	0.468951	7.38271
6	Shanghai	2018	2.9	3002.4	6177.2	0.000315818	0.32697	0.672714	0.000422236	0.437145	0.899391	1.57037	1.11837	0.452422	7.40029
6	Shanghai	2019	9.9	3199.4	7197.1	0.000951338	0.307445	0.691603	0.00125695	0.406211	0.913778	1.56954	1.15249	0.418306	7.43191
6	Shanghai	2020	9.2	2755.7	6306.6	0.00101417	0.303776	0.69521	0.00133675	0.400399	0.91634	1.56946	1.15884	0.411955	7.43802
6	Shanghai	2021	8.2	2612.9	7000.3	0.000852267	0.271572	0.727576	0.00109742	0.34969	0.936865	1.5697	1.21356	0.357242	7.49345
6	Shanghai	2022	8.2	2457.4	6584	0.000906117	0.271548	0.727546	0.00116682	0.349676	0.93687	1.56963	1.21357	0.357227	7.49326
7	Zhejiang	2011	350.4	2022.2	2164.2	0.0772351	0.445733	0.477032	0.117482	0.678002	0.725611	1.45304	0.825756	0.758874	6.76951
7	Zhejiang	2012	369.7	2180.4	2397.4	0.0747246	0.440707	0.484568	0.113348	0.668496	0.735027	1.4572	0.838611	0.74509	6.79393
7	Zhejiang	2013	378.1	2258.2	2621.5	0.0719122	0.429495	0.498593	0.10863	0.648793	0.753171	1.46195	0.864799	0.717927	6.83338
7	Zhejiang	2014	427.6	2004.5	3005.7	0.0786347	0.368623	0.552742	0.117537	0.550989	0.826194	1.45299	0.987248	0.598478	6.93194
7	Zhejiang	2015	462	2164.2	3390.4	0.0767876	0.359705	0.563508	0.114111	0.534541	0.837403	1.45644	1.00683	0.578281	6.96125
7	Zhejiang	2016	499.3	2292.6	3805.9	0.0756767	0.347479	0.576844	0.111674	0.512767	0.851234	1.45889	1.03239	0.552464	6.99391
7	Zhejiang	2017	517.7	2203.6	4320.1	0.0735223	0.312949	0.613529	0.106147	0.451816	0.885774	1.46445	1.102	0.482638	7.07998
7	Zhejiang	2018	530.4	2232.5	4761	0.0704954	0.296721	0.632784	0.100357	0.422412	0.900831	1.47027	1.13469	0.449117	7.12931
7	Zhejiang	2019	596.6	2365.5	5231.9	0.0728094	0.288687	0.638504	0.103348	0.409772	0.906314	1.46726	1.14859	0.436316	7.13529
7	Zhejiang	2020	617	2584.9	5222.3	0.0732414	0.306842	0.619916	0.105297	0.44114	0.89124	1.4653	1.11393	0.470725	7.09449
7	Zhejiang	2021	523.8	3741.3	5576.1	0.0532252	0.380167	0.566608	0.0777691	0.555474	0.827889	1.49295	0.981863	0.595463	7.03803
7	Zhejiang	2022	536.3	4078.5	5767.5	0.0516552	0.392832	0.555513	0.0757037	0.575718	0.814136	1.49502	0.957314	0.619556	7.01925
8	Fujian	2011	361.4	1866	2056.6	0.0843604	0.435574	0.480065	0.129054	0.666336	0.734398	1.44138	0.841512	0.746016	6.75319
8	Fujian	2012	416.3	1815.9	2250.7	0.092864	0.405073	0.502063	0.142485	0.621517	0.770334	1.42783	0.900118	0.691432	6.77514
8	Fujian	2013	450.6	2026.2	2551.2	0.0896181	0.402983	0.507399	0.137004	0.616064	0.77569	1.43336	0.90706	0.682989	6.79719
8	Fujian	2014	480.8	2299.3	3200.2	0.0803973	0.384479	0.535124	0.121115	0.579199	0.806138	1.44938	0.95305	0.633199	6.88745
8	Fujian	2015	512.7	2625.4	3937.4	0.0724613	0.371055	0.556484	0.107707	0.551541	0.827165	1.46288	0.986586	0.596753	6.95856
8	Fujian	2016	584.5	2853.1	4562.1	0.0730652	0.356651	0.570284	0.107992	0.527137	0.842891	1.46259	1.01557	0.568164	6.98708
8	Fujian	2017	598.1	3179.9	5606	0.0637361	0.338864	0.5974	0.0924025	0.491274	0.86609	1.47826	1.05724	0.523469	7.07274
8	Fujian	2018	652.8	3490.8	6516.3	0.0612388	0.32747	0.611291	0.0879644	0.470383	0.878067	1.48272	1.08107	0.498988	7.10929
8	Fujian	2019	670.7	3618.7	7119.9	0.0587854	0.317171	0.624044	0.0836822	0.451499	0.888339	1.48702	1.10235	0.477082	7.14283
8	Fujian	2020	675.9	3379.6	6405.8	0.0646096	0.323057	0.612333	0.0929185	0.464606	0.880629	1.47774	1.08761	0.493608	7.10205
8	Fujian	2021	796.6	3822.2	6222.8	0.0734762	0.352549	0.573974	0.108437	0.520294	0.847074	1.46215	1.0236	0.56034	6.99398
8	Fujian	2022	878	4165.9	6155.8	0.078395	0.371965	0.54964	0.117307	0.556595	0.82246	1.45322	0.980515	0.605073	6.92576
9	Guangdong	2011	225.8	4311.4	4654	0.024567	0.469079	0.506354	0.0355695	0.67916	0.733128	1.53522	0.824179	0.747886	7.0019
9	Guangdong	2012	180.1	5134.9	5191.7	0.0171414	0.488726	0.494132	0.0246566	0.702993	0.710769	1.54614	0.791199	0.780205	7.00102
9	Guangdong	2013	192.7	5352.6	5738.3	0.0170779	0.47437	0.508552	0.0245492	0.681898	0.731035	1.54624	0.820441	0.750959	7.03058
9	Guangdong	2014	201	5993.9	7034.9	0.015193	0.453061	0.531747	0.0217431	0.648389	0.760999	1.54905	0.86533	0.705945	7.08376
9	Guangdong	2015	254	6223.3	7965.9	0.0175861	0.430881	0.551533	0.025119	0.615446	0.787779	1.54567	0.907844	0.663602	7.11631
9	Guangdong	2016	273.8	6500.9	9193.8	0.0171463	0.407108	0.575746	0.024309	0.577174	0.816259	1.54648	0.955533	0.61589	7.16641
9	Guangdong	2017	315.2	6776	10633.8	0.0177828	0.382285	0.599932	0.0249898	0.537218	0.843073	1.5458	1.00366	0.567824	7.21256
9	Guangdong	2018	334.4	7164.8	11826.5	0.0173034	0.370739	0.611957	0.0241766	0.518003	0.855037	1.54662	1.02628	0.545175	7.23759
9	Guangdong	2019	468.9	5189.6	12929.8	0.0252255	0.279186	0.695588	0.0336363	0.372274	0.927513	1.53715	1.18934	0.383092	7.37323
9	Guangdong	2020	484.1	4618.4	12607.4	0.027335	0.260781	0.711884	0.0360316	0.343748	0.93837	1.53476	1.21989	0.352912	7.39696
9	Guangdong	2021	533.1	5019.2	11562.2	0.031149	0.293272	0.675579	0.0422562	0.397847	0.916478	1.52853	1.16163	0.411609	7.32045
9	Guangdong	2022	606.7	5735.7	11717.1	0.0335945	0.3176	0.648805	0.0464558	0.439189	0.897193	1.52432	1.1161	0.457425	7.2626
10	Guangxi	2011	126.8	230.6	256.4	0.206582	0.375692	0.417726	0.345112	0.627624	0.697844	1.21844	0.892299	0.798414	6.23833
10	Guangxi	2012	142.7	301.8	316.5	0.187516	0.396583	0.4159	0.310204	0.656058	0.688013	1.25539	0.855213	0.812049	6.28864
10	Guangxi	2013	154	376.9	368.6	0.171206	0.419011	0.409783	0.280401	0.686254	0.671141	1.28658	0.81447	0.835049	6.32374
10	Guangxi	2014	175.9	373.5	471.7	0.172265	0.365782	0.461953	0.280608	0.595834	0.75249	1.28637	0.932493	0.718962	6.44305
10	Guangxi	2015	183.1	404.6	542.6	0.161992	0.357958	0.48005	0.261134	0.577034	0.773848	1.3066	0.955704	0.685903	6.51711
10	Guangxi	2016	203.5	434.4	613.1	0.16267	0.347242	0.490088	0.261412	0.558021	0.787576	1.30631	0.978797	0.663931	6.54046
10	Guangxi	2017	219.4	462	695.6	0.159332	0.335512	0.505156	0.254115	0.535101	0.805663	1.31386	1.00617	0.634003	6.58793
10	Guangxi	2018	230.2	486.1	785.5	0.153283	0.323678	0.523039	0.241808	0.510612	0.825109	1.32657	1.0349	0.600401	6.64991
10	Guangxi	2019	241.3	481.8	889.4	0.149643	0.298791	0.551566	0.232042	0.463314	0.855276	1.33662	1.08906	0.544714	6.7327
10	Guangxi	2020	218.3	500.3	879.1	0.136634	0.313138	0.550228	0.210963	0.483484	0.849552	1.35824	1.06617	0.555661	6.7627
10	Guangxi	2021	230.1	634.7	1339.8	0.104373	0.287898	0.607729	0.153371	0.423053	0.893031	1.41682	1.13398	0.466761	6.98518
10	Guangxi	2022	241.2	667.2	1442	0.102621	0.283867	0.613513	0.150086	0.415164	0.897281	1.42014	1.14267	0.457225	7.003
11	Hainan	2011	131.9	130	391.6	0.201836	0.198929	0.599235	0.30449	0.300104	0.904004	1.26139	1.266	0.441751	6.75792
11	Hainan	2012	162.7	144.6	445.6	0.216098	0.192057	0.591845	0.328075	0.291577	0.898526	1.23653	1.27492	0.454396	6.71383
11	Hainan	2013	211.2	171.3	501	0.239049	0.193888	0.567063	0.370498	0.300503	0.87888	1.19125	1.26558	0.497288	6.60219
11	Hainan	2014	200.8	180.1	521.2	0.222592	0.199645	0.577763	0.342159	0.306887	0.888115	1.22158	1.25888	0.47757	6.66007
11	Hainan	2015	215.4	198	591.3	0.214392	0.197074	0.588534	0.3265	0.300125	0.896283	1.2382	1.26597	0.459481	6.70602
11	Hainan	2016	266.1	223.8	659.8	0.231452	0.194659	0.573889	0.356794	0.300077	0.884676	1.20596	1.26602	0.484997	6.63493
11	Hainan	2017	266.1	237.7	782.5	0.206872	0.184794	0.608334	0.309415	0.276392	0.909873	1.25622	1.29076	0.427817	6.77799
11	Hainan	2018	287.9	259.2	900.2	0.198922	0.179092	0.621986	0.293771	0.264486	0.918557	1.27263	1.30313	0.406383	6.83052
11	Hainan	2019	265.1	253	1056.4	0.168371	0.160686	0.670943	0.237087	0.226266	0.944772	1.33143	1.34255	0.333899	7.0133
11	Hainan	2020	265.7	238	1095	0.166198	0.148871	0.684932	0.230715	0.206663	0.950821	1.33798	1.36263	0.31492	7.05414
11	Hainan	2021	288.9	131.1	1569.4	0.14522	0.0658993	0.788881	0.180433	0.0818789	0.980173	1.38937	1.48883	0.199462	7.34522
11	Hainan	2022	320.8	282.3	1659.1	0.141809	0.12479	0.733401	0.187247	0.164775	0.968395	1.38244	1.40527	0.252085	7.20993
id	province	year	Outstanding Loans of Banking Financial Institutions (100 million yuan)	Ratio of Gross Marine Product to Coastal Regional GDP (%)	Marine Financing Scale
1	Liaoning	2011	22832	15.1	3447.63								#DIV/0!
1	Liaoning	2012	26306	13.7	3603.92
1	Liaoning	2013	29722	13.8	4101.64
1	Liaoning	2014	33024	13.7	4524.29
1	Liaoning	2015	36283	15.5	5623.86
1	Liaoning	2016	38686	15	5802.9
1	Liaoning	2017	41279	14	5779.06
1	Liaoning	2018	44985	12.4	5578.14
1	Liaoning	2019	49583	13.7	6792.87
1	Liaoning	2020	52209	13	6787.17
1	Liaoning	2021	53135	16.1	8554.74
1	Liaoning	2022	54321	16.1	8745.68
2	Hebei	2011	18460.6	5.9	1089.18
2	Hebei	2012	21318	6.1	1300.4
2	Hebei	2013	24423.2	6.2	1514.24
2	Hebei	2014	28052.3	7	1963.66
2	Hebei	2015	32608.5	7.1	2315.2
2	Hebei	2016	37352.2	6.2	2315.84
2	Hebei	2017	43315.3	7	3032.07
2	Hebei	2018	48115.3	7.1	3416.19
2	Hebei	2019	53448.1	7.5	4008.61
2	Hebei	2020	60993.2	6.2	3781.58
2	Hebei	2021	67962.8	6.8	4621.47
2	Hebei	2022	76644.7	6.8	5211.84
3	Tianjin	2011	15924.7	31.1	4952.58
3	Tianjin	2012	18396.8	30.6	5629.42
3	Tianjin	2013	20857.8	31.7	6611.92
3	Tianjin	2014	23223.4	32	7431.49
3	Tianjin	2015	25994.7	29.8	7746.41
3	Tianjin	2016	28754	22.6	6498.41
3	Tianjin	2017	31602.5	25.1	7932.24
3	Tianjin	2018	34084.9	26.7	9100.67
3	Tianjin	2019	36141.3	37.4	13516.8
3	Tianjin	2020	38859.4	28.6	11113.8
3	Tianjin	2021	41054.2	33	13547.9
3	Tianjin	2022	42494.7	34.4	14618.2
4	Shandong	2011	37301.8	17.7	6602.41
4	Shandong	2012	40018.9	17.9	7163.38
4	Shandong	2013	47952.1	17.7	8487.52
4	Shandong	2014	53662.2	19	10195.8
4	Shandong	2015	59063.3	19.7	11635.5
4	Shandong	2016	65243.5	19.5	12722.5
4	Shandong	2017	70873.9	19.5	13820.4
4	Shandong	2018	77810.5	20.3	15795.5
4	Shandong	2019	86325.6	18.9	16315.5
4	Shandong	2020	97880.6	17.7	17324.9
4	Shandong	2021	111035	18.3	20319.5
4	Shandong	2022	123995	18.5	22939
5	Jiangsu	2011	49101.2	8.7	4271.8
5	Jiangsu	2012	57464.3	8.7	4999.39
5	Jiangsu	2013	64503.2	8.3	5353.76
5	Jiangsu	2014	71949.8	8.6	6187.68
5	Jiangsu	2015	78866.3	8.7	6861.37
5	Jiangsu	2016	92957	8.5	7901.35
5	Jiangsu	2017	104007	8.1	8424.59
5	Jiangsu	2018	117808	8.2	9660.25
5	Jiangsu	2019	135140	7.7	10405.8
5	Jiangsu	2020	156577	8	12526.2
5	Jiangsu	2021	180539	7.2	12998.8
5	Jiangsu	2022	206845	7.4	15306.6
6	Shanghai	2011	37196.8	29.3	10898.7
6	Shanghai	2012	40982.5	29.5	12089.8
6	Shanghai	2013	44357.9	29.2	12952.5
6	Shanghai	2014	47915.8	26.5	12697.7
6	Shanghai	2015	53387.2	26.9	14361.2
6	Shanghai	2016	59982.2	26.5	15895.3
6	Shanghai	2017	67182	27.7	18609.4
6	Shanghai	2018	73272.4	28.1	20589.5
6	Shanghai	2019	79843	27.3	21797.1
6	Shanghai	2020	84643	23.4	19806.5
6	Shanghai	2021	96032.1	22	21127.1
6	Shanghai	2022	103139	20.2	20834.1
7	Zhejiang	2011	53239.3	14	7453.51
7	Zhejiang	2012	59509.2	14.3	8509.82
7	Zhejiang	2013	65338.8	14	9147.43
7	Zhejiang	2014	71361	13.5	9633.74
7	Zhejiang	2015	76466.3	14	10705.3
7	Zhejiang	2016	81804.5	14	11452.6
7	Zhejiang	2017	90233.3	13.6	12271.7
7	Zhejiang	2018	105775	13.4	14173.8
7	Zhejiang	2019	121751	13.1	15949.3
7	Zhejiang	2020	143612	13	18669.5
7	Zhejiang	2021	165756	13.3	22045.5
7	Zhejiang	2022	189808	13.3	25244.5
8	Fujian	2011	18982.8	24.4	4631.81
8	Fujian	2012	22427.5	22.8	5113.47
8	Fujian	2013	25963.5	23.1	5997.56
8	Fujian	2014	30051.3	24.9	7482.77
8	Fujian	2015	33694.4	27.2	9164.88
8	Fujian	2016	37787.3	27.8	10504.9
8	Fujian	2017	41899.7	29.2	12234.7
8	Fujian	2018	46503.5	29.8	13858
8	Fujian	2019	52640.8	26.9	14160.4
8	Fujian	2020	59859.7	23.8	14246.6
8	Fujian	2021	67894.6	21.9	14868.9
8	Fujian	2022	75373.6	21.6	16280.7
9	Guangdong	2011	58615.3	17.3	10140.4
9	Guangdong	2012	67077.1	18.4	12342.2
9	Guangdong	2013	75664.2	18.2	13770.9
9	Guangdong	2014	84921.8	19.5	16559.7
9	Guangdong	2015	95661.1	19.8	18940.9
9	Guangdong	2016	110928	19.8	21963.8
9	Guangdong	2017	126032	19.8	24954.3
9	Guangdong	2018	145169	19.9	28888.7
9	Guangdong	2019	167995	17.3	29063.1
9	Guangdong	2020	195681	16	31308.9
9	Guangdong	2021	222234	13.7	30446.1
9	Guangdong	2022	245723	13.9	34155.5
10	Guangxi	2011	10646.4	5.2	553.614
10	Guangxi	2012	12355.5	5.8	716.62
10	Guangxi	2013	14081	6.3	887.104
10	Guangxi	2014	16071	6.5	1044.61
10	Guangxi	2015	18119.3	6.7	1213.99
10	Guangxi	2016	20640.5	6.8	1403.56
10	Guangxi	2017	23226.1	7.4	1718.73
10	Guangxi	2018	26688.3	7.4	1974.93
10	Guangxi	2019	30497.4	7.6	2317.8
10	Guangxi	2020	35196.8	7.2	2534.17
10	Guangxi	2021	39851.1	8.7	3467.05
10	Guangxi	2022	44689.8	9	4022.08
11	Hainan	2011	3194.59	25.9	827.399
11	Hainan	2012	3889.63	26.4	1026.86
11	Hainan	2013	4630.78	28.1	1301.25
11	Hainan	2014	5391.51	25.8	1391.01
11	Hainan	2015	6650.66	27.1	1802.33
11	Hainan	2016	7687.65	28.4	2183.29
11	Hainan	2017	8459.27	28.8	2436.27
11	Hainan	2018	8820.12	29.9	2637.22
11	Hainan	2019	9521.09	29.7	2827.76
11	Hainan	2020	9981.72	28.9	2884.72
11	Hainan	2021	10607.1	30.6	3245.76
11	Hainan	2022	11090.3	32.8	3637.62
id	province	year	Marine Industrial Structure Upgrading (IND)	Marine Financing Scale (FIN)	Financial Agglomeration (AGG)
1	Liaoning	2011	6.5108	3447.63	0.51282
1	Liaoning	2012	6.5893	3603.92	0.598829
1	Liaoning	2013	6.6276	4101.64	0.709462
1	Liaoning	2014	6.8035	4524.29	0.805816
1	Liaoning	2015	6.7867	5623.87	1.01844
1	Liaoning	2016	6.7033	5802.9	1.07216
1	Liaoning	2017	6.7487	5779.06	1.07231
1	Liaoning	2018	6.9732	5578.14	1.04616
1	Liaoning	2019	7.0408	6792.87	1.05964
1	Liaoning	2020	6.9425	6787.17	1.0935
1	Liaoning	2021	6.9419	8554.74	1.00861
1	Liaoning	2022	6.87	8745.68	0.988956
2	Hebei	2011	6.7226	1089.18	0.459355
2	Hebei	2012	6.7542	1300.4	0.521298
2	Hebei	2013	6.783	1514.24	0.614123
2	Hebei	2014	6.8915	1963.66	0.697834
2	Hebei	2015	6.9509	2315.2	0.738404
2	Hebei	2016	7.1025	2315.84	0.800238
2	Hebei	2017	7.1932	3032.07	0.881961
2	Hebei	2018	7.2362	3416.19	0.905438
2	Hebei	2019	7.2233	4008.61	0.913174
2	Hebei	2020	7.081	3781.58	0.930258
2	Hebei	2021	7.0034	4621.47	0.893071
2	Hebei	2022	6.9616	5211.84	0.875167
3	Tianjin	2011	6.7038	4952.58	1.27995
3	Tianjin	2012	6.7364	5629.42	1.45808
3	Tianjin	2013	6.7252	6611.92	1.58833
3	Tianjin	2014	6.8149	7431.49	1.68251
3	Tianjin	2015	6.9143	7746.41	1.77245
3	Tianjin	2016	7.141	6498.41	1.79903
3	Tianjin	2017	7.1292	7932.24	1.84267
3	Tianjin	2018	7.1076	9100.67	1.82255
3	Tianjin	2019	7.0955	13516.8	1.79825
3	Tianjin	2020	7.0832	11113.8	1.94498
3	Tianjin	2021	7.2291	13547.9	1.80374
3	Tianjin	2022	7.0155	14618.2	1.77198
4	Shandong	2011	6.7217	6602.41	0.513395
4	Shandong	2012	6.71	7163.38	0.553133
4	Shandong	2013	6.728	8487.52	0.619961
4	Shandong	2014	6.7955	10195.8	0.659009
4	Shandong	2015	6.8455	11635.5	0.692663
4	Shandong	2016	6.9007	12722.5	0.736123
4	Shandong	2017	6.9534	13820.4	0.750686
4	Shandong	2018	6.9756	15795.5	0.769473
4	Shandong	2019	7.0766	16315.5	0.784528
4	Shandong	2020	7.0467	17324.9	0.822962
4	Shandong	2021	6.8867	20319.5	0.776446
4	Shandong	2022	6.8951	22939	0.790731
5	Jiangsu	2011	6.8182	4271.8	0.689006
5	Jiangsu	2012	6.7863	4999.39	0.75154
5	Jiangsu	2013	6.8363	5353.76	0.852416
5	Jiangsu	2014	6.7301	6187.68	0.916216
5	Jiangsu	2015	6.7026	6861.37	0.91371
5	Jiangsu	2016	6.7208	7901.35	0.949714
5	Jiangsu	2017	6.8205	8424.59	0.958938
5	Jiangsu	2018	6.8318	9660.25	0.973158
5	Jiangsu	2019	6.8179	10405.8	0.998471
5	Jiangsu	2020	6.7679	12526.2	1.06247
5	Jiangsu	2021	7.0659	12998.8	1.01604
5	Jiangsu	2022	7.0818	15306.6	1.034
6	Shanghai	2011	7.2799	10898.7	1.48124
6	Shanghai	2012	7.3043	12089.8	1.50636
6	Shanghai	2013	7.3245	12952.5	1.59127
6	Shanghai	2014	7.3297	12697.7	1.76426
6	Shanghai	2015	7.3378	14361.2	2.01497
6	Shanghai	2016	7.3674	15895.3	2.08244
6	Shanghai	2017	7.3827	18609.4	2.14639
6	Shanghai	2018	7.4003	20589.5	2.17114
6	Shanghai	2019	7.4319	21797.1	2.27907
6	Shanghai	2020	7.438	19806.5	2.45354
6	Shanghai	2021	7.4935	21127.1	2.43546
6	Shanghai	2022	7.4933	20834.1	2.49358
7	Zhejiang	2011	6.7695	7453.51	1.06968
7	Zhejiang	2012	6.7939	8509.82	1.03971
7	Zhejiang	2013	6.8334	9147.43	0.988825
7	Zhejiang	2014	6.9319	9633.74	0.934872
7	Zhejiang	2015	6.9613	10705.3	0.900167
7	Zhejiang	2016	6.9939	11452.6	0.90545
7	Zhejiang	2017	7.08	12271.7	0.953223
7	Zhejiang	2018	7.1293	14173.8	1.02923
7	Zhejiang	2019	7.1353	15949.3	1.0401
7	Zhejiang	2020	7.0945	18669.5	1.13417
7	Zhejiang	2021	7.038	22045.5	1.09459
7	Zhejiang	2022	7.0192	25244.5	1.12542
8	Fujian	2011	6.7532	4631.81	0.657517
8	Fujian	2012	6.7751	5113.47	0.741623
8	Fujian	2013	6.7972	5997.56	0.830933
8	Fujian	2014	6.8875	7482.77	0.852955
8	Fujian	2015	6.9586	9164.88	0.915107
8	Fujian	2016	6.9871	10504.9	0.931699
8	Fujian	2017	7.0727	12234.7	0.917331
8	Fujian	2018	7.1093	13858	0.883836
8	Fujian	2019	7.1428	14160.4	0.95164
8	Fujian	2020	7.1021	14246.6	1.00845
8	Fujian	2021	6.994	14868.9	0.964243
8	Fujian	2022	6.9258	16280.7	1.05434
9	Guangdong	2011	7.0019	10140.4	0.830416
9	Guangdong	2012	7.001	12342.2	0.873092
9	Guangdong	2013	7.0306	13770.9	0.953529
9	Guangdong	2014	7.0838	16559.8	0.946906
9	Guangdong	2015	7.1163	18940.9	1.08483
9	Guangdong	2016	7.1664	21963.8	1.05932
9	Guangdong	2017	7.2126	24954.3	1.05683
9	Guangdong	2018	7.2376	28888.7	1.0554
9	Guangdong	2019	7.3732	29063.1	1.07517
9	Guangdong	2020	7.397	31308.9	1.19378
9	Guangdong	2021	7.3204	30446.1	1.16176
9	Guangdong	2022	7.2626	34155.5	1.18215
10	Guangxi	2011	6.2383	553.614	0.545862
10	Guangxi	2012	6.2886	716.62	0.655846
10	Guangxi	2013	6.3237	887.104	0.782301
10	Guangxi	2014	6.4431	1044.61	0.810006
10	Guangxi	2015	6.5171	1213.99	0.891936
10	Guangxi	2016	6.5405	1403.56	0.912986
10	Guangxi	2017	6.5879	1718.73	0.92492
10	Guangxi	2018	6.6499	1974.93	0.922517
10	Guangxi	2019	6.7327	2317.8	0.916675
10	Guangxi	2020	6.7627	2534.17	0.941975
10	Guangxi	2021	6.9852	3467.05	0.886961
10	Guangxi	2022	7.003	4022.08	0.90193
11	Hainan	2011	6.7579	827.399	0.602218
11	Hainan	2012	6.7138	1026.86	0.674401
11	Hainan	2013	6.6022	1301.25	0.819718
11	Hainan	2014	6.6601	1391.01	0.916086
11	Hainan	2015	6.706	1802.33	0.907494
11	Hainan	2016	6.6349	2183.29	0.961627
11	Hainan	2017	6.778	2436.27	0.968799
11	Hainan	2018	6.8305	2637.22	1.0254
11	Hainan	2019	7.0133	2827.76	0.959756
11	Hainan	2020	7.0541	2884.72	0.942253
11	Hainan	2021	7.3452	3245.76	0.858318
11	Hainan	2022	7.2099	3637.62	0.849133

## Sheet: Moderating Variable
Length of Long-Distance Optical Cable Lines	Internet Penetration Rate	Number of Enrolled Students and Teachers in Higher Education	ACC	USE	CAP
2.5	0.23	96.09	0.916291	1.46968	0.0104069
2.46	0.29	99.46	0.900161	1.23787	0.0100543
2.45	0.38	103.07	0.896088	0.967584	0.00970214
2.46	0.49	106.25	0.900161	0.71335	0.00941176
2.46	0.63	107.09	0.900161	0.462035	0.00933794
2.41	0.76	106.36	0.879627	0.274437	0.00940203
2.5	0.74	104.42	0.916291	0.301105	0.00957671
2.19	0.77	102.57	0.783902	0.261365	0.00974944
2.33	0.45	110.42	0.845868	0.798508	0.00905633
2.31	0.46	120.48	0.837248	0.776529	0.00830013
2.35	0.45	124.1	0.854415	0.798508	0.00805802
2.4	0.47	124.46	0.875469	0.755023	0.00803471
3.19	0.86	121.21	1.16002	0.150823	0.00825014
3.43	1.27	123.38	1.23256	-0.239017	0.00810504
3.53	1.45	124.12	1.2613	-0.371564	0.00805672
3.57	1.54	123.29	1.27257	-0.431782	0.00811096
3.68	2.05	124.86	1.30291	-0.71784	0.00800897
3.7	2.66	128.65	1.30833	-0.978326	0.00777303
3.82	2.93	134.18	1.34025	-1.075	0.00745268
3.51	3.03	141.81	1.25562	-1.10856	0.00705169
3.71	0.45	155.31	1.31103	0.798508	0.00643874
3.74	0.47	169.02	1.31909	0.755023	0.00591646
3.74	0.51	179.37	1.31909	0.673345	0.00557507
3.84	0.54	186.85	1.34547	0.616186	0.00535189
0.31	0.04	47.86	-1.17118	3.21888	0.0208943
0.31	0.05	50.3	-1.17118	2.99573	0.0198807
0.35	0.03	52.08	-1.04982	3.50656	0.0192012
0.35	0.04	53.68	-1.04982	3.21888	0.0186289
0.37	0.06	54.4	-0.994252	2.81341	0.0183824
0.38	0.09	54.43	-0.967584	2.40795	0.0183722
0.41	0.09	54.58	-0.891598	2.40795	0.0183217
0.41	0.11	55.47	-0.891598	2.20727	0.0180278
0.43	0.13	57.21	-0.84397	2.04022	0.0174795
0.46	0.15	60.64	-0.776529	1.89712	0.0164908
0.4	0.16	61.59	-0.916291	1.83258	0.0162364
0.44	0.17	62.79	-0.820981	1.77196	0.0159261
3.3	0.71	174.02	1.19392	0.34249	0.00574647
3.26	0.86	175.46	1.18173	0.150823	0.0056993
3.24	1.02	179.72	1.17557	-0.0198026	0.00556421
3.49	1.19	189.81	1.2499	-0.173953	0.00526843
3.67	0.72	200.53	1.30019	0.328504	0.00498679
3.91	0.82	210.36	1.36354	0.198451	0.00475376
4.07	0.97	212.61	1.40364	0.0304592	0.00470345
3.64	1.07	215.35	1.29198	-0.0676586	0.0046436
3.8	1.16	230.15	1.335	-0.14842	0.00434499
3.94	1.11	241.57	1.37118	-0.10436	0.00413959
3.35	1.14	255.98	1.20896	-0.131028	0.00390656
3.56	1.19	266.26	1.26976	-0.173953	0.00375573
3.28	0.52	176.33	1.18784	0.653926	0.00567118
3.28	0.72	177.72	1.18784	0.328504	0.00562683
3	0.75	179.28	1.09861	0.287682	0.00557787
3.62	0.85	180.31	1.28647	0.162519	0.005546
3.88	1.14	182.29	1.35584	-0.131028	0.00548576
3.91	1.36	185.56	1.36354	-0.307485	0.00538909
4.31	1.56	188.08	1.46094	-0.444686	0.00531689
3.74	1.7	192.27	1.31909	-0.530628	0.00520102
3.91	0.62	199.47	1.36354	0.478036	0.00501329
4.04	0.61	214.07	1.39624	0.494296	0.00467137
3.96	0.61	222.74	1.37624	0.494296	0.00448954
4.1	0.62	234.3	1.41099	0.478036	0.00426803
0.47	0.15	55.09	-0.755023	1.89712	0.0181521
0.48	0.32	54.67	-0.733969	1.13943	0.0182916
0.37	0.29	54.51	-0.994252	1.23787	0.0183453
0.51	0.29	54.72	-0.673345	1.23787	0.0182749
0.51	0.29	55.32	-0.673345	1.23787	0.0180766
0.56	0.32	55.7	-0.579818	1.13943	0.0179533
0.53	0.36	55.84	-0.634878	1.02165	0.0179083
0.4	0.37	56.24	-0.916291	0.994252	0.0177809
0.42	2.28	57.29	-0.867501	-0.824175	0.0174551
0.5	2.55	58.84	-0.693147	-0.936093	0.0169952
0.48	2.54	59.74	-0.733969	-0.932164	0.0167392
0.47	2.71	60.52	-0.755023	-0.996949	0.0165235
2.38	0.14	95.98	0.8671	1.96611	0.0104188
2.5	0.21	98.65	0.916291	1.56065	0.0101368
2.58	0.23	101.56	0.947789	1.46968	0.0098464
2.57	0.25	103.63	0.943906	1.38629	0.00964972
2.63	0.44	105.06	0.966984	0.820981	0.00951837
2.63	0.43	105.66	0.966984	0.84397	0.00946432
2.77	0.49	106.47	1.01885	0.71335	0.00939232
2.68	0.53	108.28	0.985817	0.634878	0.00923532
2.66	0.55	114.14	0.978326	0.597837	0.00876117
2.7	0.48	121.91	0.993252	0.733969	0.00820277
2.8	0.49	128.45	1.02962	0.71335	0.00778513
2.99	0.51	133.17	1.09527	0.673345	0.0075092
2.16	0.19	71.45	0.770108	1.66073	0.0139958
2.18	0.3	74.25	0.779325	1.20397	0.013468
2.17	0.29	77.34	0.774727	1.23787	0.0129299
2.25	0.33	79.24	0.81093	1.10866	0.0126199
2.33	0.47	80.33	0.845868	0.755023	0.0124486
2.43	0.49	80.12	0.887891	0.71335	0.0124813
2.53	0.57	79.64	0.928219	0.562119	0.0125565
2.35	0.64	81.9	0.854415	0.446287	0.01221
2.47	3.69	91.03	0.904218	-1.30563	0.0109854
2.5	3.8	99.92	0.916291	-1.335	0.010008
2.62	3.96	107.63	0.963174	-1.37624	0.00929109
2.69	4.13	113.32	0.989541	-1.41828	0.00882457
4.68	2.67	161.02	1.5433	-0.982078	0.00621041
4.91	3.12	170.42	1.59127	-1.13783	0.00586786
4.99	3.26	180.1	1.60744	-1.18173	0.00555247
5.06	3.5	188.94	1.62137	-1.25276	0.00529269
5.61	0.41	195.53	1.72455	0.891598	0.0051143
5.81	0.55	199.41	1.75958	0.597837	0.00501479
5.52	0.53	203.02	1.70838	0.634878	0.00492562
5.4	0.66	207.14	1.6864	0.415515	0.00482765
5.83	0.68	216.87	1.76302	0.385662	0.00461106
5.78	0.69	252.26	1.7544	0.371064	0.00396416
5.79	0.74	266.86	1.75613	0.301105	0.00374728
6.21	0.78	280.68	1.82616	0.248461	0.00356278
3.47	0.13	63.36	1.24415	2.04022	0.0157828
3.48	0.18	66.42	1.24703	1.7148	0.0150557
3.79	0.21	69.25	1.33237	1.56065	0.0144404
3.85	0.24	73.96	1.34807	1.42712	0.0135208
3.9	0.32	78.98	1.36098	1.13943	0.0126614
3.89	0.43	85.07	1.35841	0.84397	0.011755
3.92	0.45	90.99	1.36609	0.798508	0.0109902
3.97	0.56	98.74	1.37877	0.579818	0.0101276
4.03	0.61	112.51	1.39377	0.494296	0.0088881
4.15	0.67	123.76	1.42311	0.400478	0.00808016
4.37	0.71	137.76	1.47476	0.34249	0.007259
4.57	0.76	146.92	1.51951	0.274437	0.00680643
0.33	0.14	16.47	-1.10866	1.96611	0.0607165
0.33	0.19	17.66	-1.10866	1.66073	0.0566251
0.33	0.22	18.06	-1.10866	1.51413	0.055371
0.33	0.24	18.95	-1.10866	1.42712	0.0527704
0.34	0.42	19.19	-1.07881	0.867501	0.0521105
0.34	0.55	19.42	-1.07881	0.597837	0.0514933
0.34	0.59	19.51	-1.07881	0.527633	0.0512558
0.09	0.74	19.93	-2.40795	0.301105	0.0501756
0.32	0.8	21.85	-1.13943	0.223144	0.0457666
0.32	0.84	24.2	-1.13943	0.174353	0.0413223
0.29	1.07	25.81	-1.23787	-0.0676586	0.0387447
0.29	1.02	27.2	-1.23787	-0.0198026	0.0367647

## Sheet: Threshold Variable
Local Fiscal Expenditure on Financial Regulation (100 million yuan)	Local Fiscal General Budget Expenditure (100 million yuan)	REG	Marine Venture Capital Amount	VEN
13.32	3905.85	0.00341027	1656.86	7.41268
7.62	4558.59	0.00167157	1230	7.11477
4.82	5197.42	0.000927383	306.56	5.72541
3.89	5080.49	0.000765674	1117.84	7.01915
12.37	4481.61	0.00276017	890.828	6.79215
28.1	4577.47	0.00613876	1329.27	7.19239
2.18	4879.42	0.000446774	3765.55	8.23365
3.77	5337.72	0.000706294	1514.39	7.32277
73.45	5745.09	0.0127848	1239.38	7.12237
16.56	6014.17	0.0027535	1116.41	7.01787
111.69	5879.21	0.0189975	594.819	6.38826
34.62	6261.43	0.00552909	741.434	6.60859
2.08	3537.39	0.000588004	151.684	5.0218
4.89	4079.44	0.00119869	191.889	5.25692
7.84	4409.58	0.00177795	388.86	5.96322
1.98	4677.3	0.000423321	284.722	5.65151
3.19	5632.19	0.000566387	595.311	6.38908
7.5	6049.53	0.00123977	477.805	6.1692
4.09	6639.18	0.00061604	1438.03	7.27103
9.74	7726.21	0.00126064	1013.39	6.92106
9.59	8309.04	0.00115416	526.532	6.26631
5.39	9022.79	0.000597376	653.604	6.4825
5.73	8848.21	0.000647589	424.304	6.05045
6.98	9305.64	0.000750083	886.156	6.78689
1.92	1796.33	0.00106885	1448.45	7.27825
2.81	2143.21	0.00131112	4171.88	8.33612
3.02	2549.21	0.00118468	2409.01	7.78697
2.93	2884.7	0.0010157	1335.33	7.19693
3.67	3232.35	0.0011354	5843.23	8.67304
3.05	3699.43	0.000824451	3246.73	8.0854
5.52	3282.54	0.00168162	10503.4	9.25945
3.6	3103.16	0.00116011	2759.03	7.92263
4.71	3555.71	0.00132463	2154.22	7.67518
9.35	3151.35	0.00296698	4563.45	8.42583
2.17	3152.55	0.000688332	5321.76	8.57956
6.05	2729.83	0.00221626	1513.42	7.32213
21.17	5002.07	0.00423225	3299.54	8.10154
17.35	5904.52	0.00293843	1633.09	7.39823
12.93	6688.8	0.00193308	1322.71	7.18744
11.89	7177.31	0.00165661	1416.96	7.25627
48.74	8250.01	0.00590787	6488.64	8.77781
43.17	8755.21	0.00493078	6320.69	8.75158
22.75	9258.4	0.00245723	12583.2	9.44012
62.14	10101	0.00615189	6602.64	8.79522
161.07	10739.8	0.0149975	4723.89	8.46039
91.57	11233.5	0.0081515	5183.05	8.55315
115.33	11713.2	0.00984619	5492.83	8.6112
94.03	12128.6	0.00775273	5384.14	8.59121
27.45	6221.72	0.00441196	1633.17	7.39828
22.98	7027.67	0.00326993	1294.47	7.16586
16.5	7798.47	0.0021158	1625.08	7.39331
14.84	8472.45	0.00175156	1387.52	7.23527
18.05	9687.58	0.00186321	3559.87	8.17748
26.95	9981.96	0.00269987	5717.85	8.65135
13.59	10621	0.00127954	7984.78	8.98529
16.09	11657.4	0.00138025	8785.28	9.08083
16.05	12573.5	0.00127649	6165.55	8.72673
18.75	13681.5	0.00137046	8454.1	9.04241
39.45	14585.3	0.00270479	7163.15	8.87671
24.94	14901.4	0.00167367	5076.79	8.53243
13.81	3914.88	0.00352757	4967.88	8.51075
17.05	4184.02	0.00407503	8218.54	9.01415
15.09	4528.61	0.00333215	6870.48	8.83499
15.2	4923.44	0.00308727	11528.6	9.35259
17.87	6191.56	0.00288619	36207.4	10.497
20.4	6918.94	0.00294843	27752.5	10.2311
26.37	7547.62	0.00349382	56552	10.9429
59.07	8351.54	0.00707295	40749.3	10.6152
29.94	8179.28	0.00366047	34518.8	10.4493
25.88	8102.11	0.00319423	44832	10.7107
18.48	8430.86	0.00219195	25670.8	10.1531
53.54	9393	0.00569999	13207.5	9.48854
5.78	3842.59	0.00150419	3422.86	8.13823
9.87	4161.88	0.00237152	1919.99	7.56008
12.14	4730.47	0.00256634	2019.09	7.6104
10.13	5159.57	0.00196334	3884.19	8.26467
30.51	6645.98	0.00459075	11559.7	9.35528
10.33	6974.26	0.00148116	10663.4	9.27457
10.47	7530.32	0.00139038	15887.5	9.67329
64.26	8629.53	0.00744652	14775.5	9.60073
40.7	10053	0.00404853	8202.81	9.01223
52.55	10082	0.00521225	16443.3	9.70767
26.91	11014.6	0.00244312	13293.4	9.49502
33.68	12017.8	0.00280251	6725.43	8.81365
1.58	2198.18	0.000718776	1649.35	7.40814
2.98	2607.5	0.00114286	713.353	6.56998
2.78	3068.8	0.000905892	1630.67	7.39675
2.98	3306.7	0.000901201	1624.41	7.3929
4.86	4001.58	0.00121452	7922.57	8.97747
6.28	4275.4	0.00146887	9110.37	9.11717
13.8	4684.15	0.00294611	16385.3	9.70414
6.32	4832.69	0.00130776	3056.5	8.02503
4.14	5077.93	0.000815293	6726.71	8.81384
10.48	5216.1	0.00200916	9495.8	9.1586
9.35	5204.72	0.00179645	2429.43	7.79541
11.55	5691.22	0.00202944	8817.54	9.0845
14.61	6712.4	0.00217657	7564	8.93116
27.67	7387.86	0.00374533	5926.04	8.68711
16.43	8411	0.00195339	6398.77	8.76386
45.56	9152.64	0.0049778	12376.5	9.42355
141.17	12827.8	0.011005	18639.7	9.83305
159.47	13446.1	0.01186	29103.1	10.2786
20.65	15037.5	0.00137324	58443.7	10.9758
70.61	15729.3	0.00448909	25241.5	10.1362
55.28	17297.8	0.00319577	28789.1	10.2678
28.89	17430.8	0.00165741	35523.4	10.4779
23.47	18247	0.00128624	21589.2	9.97995
88.65	18533.1	0.00478334	15625.9	9.65669
8.04	2545.28	0.00315879	145.644	4.98117
5.12	2985.23	0.00171511	45.3792	3.81505
7.04	3208.67	0.00219406	72.1035	4.2781
2.65	3479.79	0.00076154	36.5053	3.59746
33.79	4065.51	0.00831138	197.519	5.28583
5.29	4441.7	0.00119099	148.958	5.00366
3.48	4908.55	0.000708967	1049.65	6.95621
4.16	5310.74	0.000783318	388.905	5.96334
5.78	5850.96	0.000987872	437.133	6.08024
15.67	6179.47	0.00253582	355.334	5.87306
70.96	5806.54	0.0122207	267.217	5.58806
62.23	5893.32	0.0105594	7.4547	2.00884
0.25	778.8	0.000321007	2357.1	7.76519
0.75	911.67	0.000822666	454.566	6.11934
1.39	1011.17	0.00137465	978.709	6.88623
1.64	1099.74	0.00149126	310.673	5.73874
0.53	1239.43	0.000427616	858.241	6.75488
1.26	1376.48	0.000915378	1073.24	6.97844
0.88	1443.97	0.000609431	1899.23	7.5492
1.13	1691.3	0.000668125	770.442	6.64696
1.15	1858.6	0.000618745	115.833	4.75215
2.41	1972.46	0.00122182	1649.9	7.40847
5.96	1971.37	0.00302328	207.544	5.33534
38.14	2097.37	0.0181847	200.28	5.29972

## Sheet: Control Variable
Region	Year	Gross Regional Product (100 million yuan)	Urban Built-up Area (km²)	Highway Mileage (km)	Administrative Land Area (km²)	Gross Regional Product (100 million yuan)	Local Fiscal General Budget Expenditure (100 million yuan)	Economic Density (ECO)	Urbanization Level (%) (URB)	Infrastructure Level (INF)	Urban Population Density (persons/km²) (POP)	Government Intervention (GOV)
Liaoning	2011	22226.7	12821.7	104026	147256	16354.9	3905.85	1.73352	0.641	0.70643	1712	0.238818
Liaoning	2012	24846.4	13966.5	105562	147256	17848.6	4558.59	1.779	0.6565	0.71686	1624	0.255403
Liaoning	2013	27077.7	13973.9	110973	147256	19208.8	5197.42	1.93773	0.6645	0.753606	1663	0.270575
Liaoning	2014	28626.6	14084.2	115430	147256	20025.7	5080.49	2.03254	0.6705	0.783873	1615	0.253698
Liaoning	2015	28669	14316.3	120365	147256	20210.3	4481.61	2.00254	0.6735	0.817386	1590	0.221749
Liaoning	2016	22246.9	15148.1	120613	147256	20392.5	4577.47	1.46863	0.6737	0.81907	1485	0.224468
Liaoning	2017	23942	12799.8	122705	147256	21693	4879.42	1.8705	0.6749	0.83328	1770	0.224931
Liaoning	2018	25315.3	12899.4	122974	147256	23510.5	5337.72	1.96252	0.681	0.835101	1782.34	0.227036
Liaoning	2019	24909.5	12894.6	124767	147256	24855.3	5745.09	1.93177	0.6811	0.847282	1806.81	0.231141
Liaoning	2020	25115	12509.1	130899	147256	25011.4	6014.17	2.00774	0.7214	0.888921	1805	0.240457
Liaoning	2021	27584.1	12321.7	131588	147256	27569.5	5879.21	2.23867	0.7281	0.893599	1832.8	0.213251
Liaoning	2022	28975.1	13067.8	131065	147256	28826.1	6261.43	2.2173	0.73	0.890052	1792.38	0.217214
Hebei	2011	24515.8	6627	156965	186535	21384.7	3537.39	3.69938	0.456	0.841477	2362	0.165417
Hebei	2012	26575	6611.2	163045	186535	23077.5	4079.44	4.0197	0.468	0.874072	2411	0.176771
Hebei	2013	28301.4	6477.9	174492	186535	24259.6	4409.58	4.36892	0.4812	0.935438	2483	0.181766
Hebei	2014	29421.2	6412.43	179200	186535	25208.9	4677.3	4.58814	0.4933	0.960678	2540	0.185542
Hebei	2015	29806.1	6398.7	184553	186535	26398.4	5632.19	4.65815	0.5133	0.989375	2646	0.213353
Hebei	2016	32070.5	6613.44	188431	186535	28474.1	6049.53	4.84928	0.5332	1.01016	2659	0.212457
Hebei	2017	35964	6907.3	191693	186535	30640.8	6639.18	5.20667	0.5501	1.02765	2675	0.216678
Hebei	2018	36010.3	5926.79	193252	186535	32494.6	7726.21	6.07585	0.5643	1.03601	3210.36	0.237769
Hebei	2019	35104.5	6309.33	196983	186535	34978.6	8309.04	5.56391	0.5762	1.05601	3062.77	0.237546
Hebei	2020	36206.9	6320.9	204737	186535	36013.8	9022.79	5.72812	0.6007	1.09758	3085	0.250537
Hebei	2021	40391.3	6324	207170	186535	40397.1	8848.21	6.38699	0.6114	1.11062	3162.32	0.219031
Hebei	2022	42370.4	6363.96	209209	186535	41988	9305.64	6.65787	0.6165	1.12156	3149.66	0.221626
Tianjin	2011	11307.3	2334.5	15163	11967	8112.5	1796.33	4.84356	0.805	1.26707	2636	0.221427
Tianjin	2012	12893.9	2334.5	15391	11967	9043	2143.21	5.52319	0.8155	1.28612	2782	0.237002
Tianjin	2013	14370.2	2334.5	15718	11967	9945.4	2549.21	6.15556	0.8201	1.31345	2843	0.256321
Tianjin	2014	15726.9	2363.05	16110	11967	10640.6	2884.7	6.65535	0.8227	1.3462	3328	0.271103
Tianjin	2015	16538.2	2506.11	16550	11967	10879.5	3232.35	6.59915	0.8264	1.38297	3492	0.297105
Tianjin	2016	17885.4	2583.28	16764	11967	11477.2	3699.43	6.92352	0.8293	1.40085	3639	0.322329
Tianjin	2017	18595.4	2585.18	16532.2	11967	12450.6	3282.54	7.19307	0.8293	1.38148	3276	0.263645
Tianjin	2018	18809.6	2585.19	16256.7	11967	13362.9	3103.16	7.27592	0.8315	1.35846	5016.3	0.232222
Tianjin	2019	14104.3	2639.78	16131.9	11967	14055.5	3555.71	5.34298	0.8348	1.34803	4939.2	0.252976
Tianjin	2020	14083.7	2639.8	16411	11967	14008	3151.35	5.33515	0.847	1.37135	4449	0.224968
Tianjin	2021	15695	2653.42	15307.2	11967	15685.1	3152.55	5.91501	0.8488	1.27912	4392.07	0.20099
Tianjin	2022	16311.3	2653.44	15230.5	11967	16132.2	2729.83	6.14723	0.8511	1.27271	4371.95	0.169216
Shandong	2011	45361.8	20157.6	233190	158971	39064.9	5002.07	2.25036	0.51	1.46687	1389	0.128045
Shandong	2012	50013.2	21421.5	244586	158971	42957.3	5904.52	2.33472	0.5243	1.53856	1349	0.137451
Shandong	2013	54684.3	21635.3	252786	158971	47344.3	6688.8	2.52755	0.5375	1.59014	1361	0.14128
Shandong	2014	59426.6	21310.9	259515	158971	50774.8	7177.31	2.78856	0.5501	1.63247	1426	0.141356
Shandong	2015	63002.3	21567.9	263447	158971	55288.8	8250.01	2.92111	0.5701	1.6572	1452	0.149217
Shandong	2016	68024.5	22424.2	265720	158971	58762.5	8755.21	3.03353	0.5902	1.6715	1502	0.148993
Shandong	2017	72678.2	22733.7	270590	158971	63012.1	9258.4	3.19694	0.6058	1.70214	1554	0.146931
Shandong	2018	76469.7	22784.4	275642	158971	66648.9	10101	3.35623	0.6118	1.73391	1621.76	0.151555
Shandong	2019	71067.5	23206.3	280325	158971	70540.5	10739.8	3.06242	0.6151	1.76337	1664.69	0.15225
Shandong	2020	73129	23953.8	286814	158971	72798.2	11233.5	3.05292	0.6305	1.80419	1665	0.15431
Shandong	2021	83095.9	23814.1	288143	158971	82875.2	11713.2	3.48936	0.6394	1.81255	1715.62	0.141335
Shandong	2022	87435.1	24105.9	291759	158971	87576.9	12128.6	3.62712	0.6454	1.8353	1724.35	0.138491
Jiangsu	2011	49110.3	13272.3	152247	105875	48839.2	6221.72	3.70021	0.619	1.43799	2013	0.127392
Jiangsu	2012	54058.2	13957	154118	105875	53701.9	7027.67	3.8732	0.63	1.45566	2002	0.130864
Jiangsu	2013	59161.8	14307.6	156094	105875	59349.4	7798.47	4.13499	0.6411	1.47432	2016	0.131399
Jiangsu	2014	65088.3	14609.8	157521	105875	64830.5	8472.45	4.4551	0.6521	1.4878	2038	0.130686
Jiangsu	2015	70116.4	15110.5	158805	105875	71255.9	9687.58	4.64024	0.6652	1.49993	2034	0.135955
Jiangsu	2016	77388.3	15277.6	157304	105875	77350.9	9981.96	5.06548	0.6772	1.48575	2057	0.129048
Jiangsu	2017	85900.9	15368.4	158475	105875	85869.8	10621	5.58946	0.6876	1.49681	2092	0.123688
Jiangsu	2018	92595.4	15536.4	158729	105875	93207.6	11657.4	5.95991	0.6961	1.49921	2176.45	0.125069
Jiangsu	2019	99631.5	15536.4	159937	105875	98656.8	12573.5	6.41279	0.7061	1.51062	2221.06	0.127447
Jiangsu	2020	102719	15796.7	158101	105875	102808	13681.5	6.50256	0.7344	1.49328	2240	0.133079
Jiangsu	2021	116364	15931	158036	105875	117392	14585.3	7.30427	0.7394	1.49266	2277.65	0.124244
Jiangsu	2022	122876	17190.2	158000	105875	122089	14901.4	7.14802	0.7442	1.49233	2156.04	0.122053
Shanghai	2011	19195.7	6340.5	12084	6341	20009.7	3914.88	3.02747	0.893	1.90569	3702	0.195649
Shanghai	2012	20181.7	6340.5	12541	6341	21305.6	4184.02	3.18299	0.893	1.97776	3754	0.196381
Shanghai	2013	21602.1	6340.5	12633	6341	23204.1	4528.61	3.40701	0.896	1.99227	3809	0.195164
Shanghai	2014	23567.7	6340.5	12945	6341	25269.8	4923.44	3.71701	0.896	2.04148	3826	0.194835
Shanghai	2015	25123.5	6340.5	13195	6341	26887	6191.56	3.96238	0.876	2.0809	3809	0.230281
Shanghai	2016	28178.7	6340.5	13292	6341	29887	6918.94	4.44423	0.879	2.0962	3816	0.231503
Shanghai	2017	30133.9	6340.5	13322	6341	32925	7547.62	4.7526	0.877	2.10093	3814	0.229237
Shanghai	2018	32679.9	6340.5	13106.4	6341	36011.8	8351.54	5.15415	0.881	2.06693	3822.7	0.231911
Shanghai	2019	38155.3	6340.5	13044.6	6341	37987.6	8179.28	6.01771	0.883	2.05719	3829.57	0.215314
Shanghai	2020	38700.6	6340.5	12917	6341	38963.3	8102.11	6.10371	0.893	2.03706	3830	0.207942
Shanghai	2021	43214.9	6340.5	13082.5	6341	43653.2	8430.86	6.81569	0.893	2.06316	3926.24	0.193133
Shanghai	2022	44652.8	6340.5	13004.8	6341	44809.1	9393	7.04247	0.8933	2.05091	3904.88	0.209623
Zhejiang	2011	32318.8	10484.3	111776	104460	31854.8	3842.59	3.08259	0.623	1.07004	1741	0.120628
Zhejiang	2012	34665.3	10515.2	113550	104460	34382.4	4161.88	3.29669	0.632	1.08702	1786	0.121047
Zhejiang	2013	37568.5	10991.7	115426	104460	37334.6	4730.47	3.4179	0.64	1.10498	1818	0.126705
Zhejiang	2014	40173	11094.6	116367	104460	40023.5	5159.57	3.62094	0.6487	1.11399	1828	0.128914
Zhejiang	2015	42886.5	11326.5	118015	104460	43507.7	6645.98	3.78638	0.658	1.12976	1914	0.152754
Zhejiang	2016	47251.4	11311.8	119053	104460	47254	6974.26	4.17719	0.67	1.1397	2059	0.147591
Zhejiang	2017	51768.3	11590.5	120101	104460	52403.1	7530.32	4.46644	0.68	1.14974	2109	0.1437
Zhejiang	2018	56197.2	11913.8	120662	104460	58002.8	8629.53	4.71697	0.689	1.1551	2136.59	0.148778
Zhejiang	2019	62351.7	12421.8	121813	104460	62462	10053	5.01956	0.7	1.16612	2064.44	0.160946
Zhejiang	2020	64613.3	13461.4	123080	104460	64689.1	10082	4.7999	0.7217	1.17825	2105	0.155853
Zhejiang	2021	73515.8	13924.1	123885	104460	74040.8	11014.6	5.27977	0.7266	1.18596	2322.15	0.148764
Zhejiang	2022	77715.4	13885.4	122918	104460	78060.6	12017.8	5.59691	0.7338	1.1767	2343.63	0.153954
Fujian	2011	17560.2	4481.4	92322	124160	17917.7	2198.18	3.91846	0.581	0.743573	2306	0.122682
Fujian	2012	19701.8	4500.9	94661	124160	20190.7	2607.5	4.3773	0.596	0.762411	2388	0.129144
Fujian	2013	21759.6	4298.7	99535	124160	22503.8	3068.8	5.06191	0.6077	0.801667	2570	0.136368
Fujian	2014	24055.8	4318.09	101190	124160	24942.1	3306.7	5.57093	0.618	0.814997	2627	0.132575
Fujian	2015	25979.8	4368.15	104585	124160	26819.5	4001.58	5.94756	0.626	0.842341	2704	0.149204
Fujian	2016	28810.6	4440.87	106757	124160	29609.4	4275.4	6.4876	0.636	0.859834	2758	0.144393
Fujian	2017	32298.3	4473.89	108012	124160	33842.4	4684.15	7.21928	0.648	0.869939	2854	0.138411
Fujian	2018	35804	4048.41	108901	124160	38687.8	4832.69	8.84398	0.6582	0.877104	3238.41	0.124915
Fujian	2019	42395	4138.17	109785	124160	42326.6	5077.93	10.2449	0.665	0.884223	3193.27	0.11997
Fujian	2020	43903.9	3919.1	110118	124160	43608.6	5216.1	11.2025	0.6875	0.886904	3545	0.119612
Fujian	2021	48810.4	4138.09	111031	124160	49566.1	5204.72	11.7954	0.697	0.894255	3577.13	0.105006
Fujian	2022	53109.9	4325.72	112878	124160	51765.1	5691.22	12.2777	0.7011	0.909136	3492.07	0.109943
Guangdong	2011	53210.3	17957.2	190724	179749	53072.8	6712.4	2.96317	0.665	1.06106	2637	0.126475
Guangdong	2012	57067.9	15984.1	194943	179749	57007.7	7387.86	3.57029	0.674	1.08453	2927	0.129594
Guangdong	2013	62164	16136.5	202915	179749	62503.4	8411	3.85238	0.6776	1.12888	3066	0.134569
Guangdong	2014	67809.9	17036.4	212094	179749	68173	9152.64	3.98029	0.68	1.17995	2999	0.134256
Guangdong	2015	72812.6	16825.7	216023	179749	74732.4	12827.8	4.32745	0.6871	1.2018	3060	0.17165
Guangdong	2016	80854.9	17086.3	218085	179749	82163.2	13446.1	4.73216	0.692	1.21328	3193	0.163651
Guangdong	2017	89879.2	16834.7	219580	179749	91648.7	15037.5	5.33893	0.6985	1.22159	3253	0.164077
Guangdong	2018	97277.8	16634.1	217699	179749	99945.2	15729.3	5.8481	0.707	1.21113	3469.01	0.157379
Guangdong	2019	107672	16079.3	220290	179749	107987	17297.8	6.69632	0.714	1.22554	3859.28	0.160185
Guangdong	2020	110761	16213.2	221873	179749	111152	17430.8	6.83153	0.7415	1.23435	3909	0.15682
Guangdong	2021	124370	17101.3	222987	179749	124720	18247	7.27253	0.7463	1.24055	3818.63	0.146304
Guangdong	2022	129119	17126.6	223081	179749	129514	18533.1	7.53908	0.7479	1.24107	3855.91	0.143098
Guangxi	2011	11720.9	5789.1	104889	238576	10299.9	2545.28	2.02464	0.418	0.439646	1569	0.247117
Guangxi	2012	13035.1	6067.4	107906	238576	11303.6	2985.23	2.14838	0.4353	0.452292	1528	0.264096
Guangxi	2013	14378	6103.6	111384	238576	12448.4	3208.67	2.35566	0.4481	0.46687	1543	0.257758
Guangxi	2014	15672.9	5886.63	114900	238576	13587.8	3479.79	2.66246	0.4601	0.481608	1684	0.256097
Guangxi	2015	16803.1	5728.04	117993	238576	14797.8	4065.51	2.93349	0.4706	0.494572	1823	0.274737
Guangxi	2016	18317.6	5752.04	120547	238576	16116.6	4441.7	3.18455	0.4808	0.505277	1891	0.275598
Guangxi	2017	20396.2	5789.43	123259	238576	17790.7	4908.55	3.52302	0.4921	0.516646	1950	0.275905
Guangxi	2018	20352.5	5814.43	125449	238576	19627.8	5310.74	3.50034	0.5022	0.525826	2024.62	0.270572
Guangxi	2019	21237.1	5814.43	127819	238576	21237.1	5850.96	3.65249	0.5109	0.535756	2096.96	0.275507
Guangxi	2020	22156.7	5876.8	131642	238576	22120.9	6179.47	3.7702	0.542	0.551782	2162	0.27935
Guangxi	2021	24740.9	5305.61	160637	238576	25209.1	5806.54	4.66316	0.5508	0.673317	2529.83	0.230335
Guangxi	2022	26300.9	5394.85	172391	238576	26186.1	5893.32	4.87519	0.5565	0.722584	2472.86	0.225055
Hainan	2011	2522.66	850.1	22916	7632	2463.8	778.8	2.96749	0.505	3.00262	2639	0.316097
Hainan	2012	2855.54	1149.1	24265	7632	2789.4	911.67	2.48502	0.516	3.17938	2079	0.326834
Hainan	2013	3146.46	1265	24852	7632	3115.9	1011.17	2.48732	0.5274	3.25629	1946	0.324519
Hainan	2014	3500.72	1276.68	26002	7632	3449	1099.74	2.74205	0.5376	3.40697	2069	0.318858
Hainan	2015	3702.76	1427.88	26860	7632	3734.2	1239.43	2.59319	0.5512	3.51939	2045	0.331913
Hainan	2016	4053.2	1428.18	28217	7632	4090.2	1376.48	2.83802	0.5678	3.6972	2050	0.336531
Hainan	2017	4462.54	1444.67	30684.3	7632	4497.5	1443.97	3.08897	0.5804	4.02048	2070	0.321061
Hainan	2018	4832.05	1489.33	35022.7	7632	4910.7	1691.3	3.24445	0.5906	4.58893	2460.3	0.344411
Hainan	2019	5308.93	1478.79	38106.8	7632	5330.8	1858.6	3.59005	0.5923	4.99303	2351.99	0.348653
Hainan	2020	5532.39	1439.4	40163	7632	5566.2	1972.46	3.84354	0.6027	5.26245	2444	0.354364
Hainan	2021	6475.2	1439.41	41045.5	7632	6504.1	1971.37	4.49851	0.6097	5.37808	2279.34	0.303097
Hainan	2022	6818.2	1340.03	41686.8	7632	6889.6	2097.37	5.0881	0.6149	5.46211	2486.74	0.304426

## Sheet: Instrumental Variable
province	year	Digital Inclusive Finance Aggregate Index	National Digital Inclusive Finance Aggregate Index	First Difference of Digital Inclusive Finance Index	One-period Lagged Digital Inclusive Finance Index	Bartik Instrumental Variable (Bartik IV)
Liaoning	2011	60.58	40.0042
Liaoning	2012	122.96	99.6855	59.6813	60.58	3615.49
Liaoning	2013	175.26	155.349	55.6639	122.96	6844.43
Liaoning	2014	200.16	179.749	24.3994	175.26	4276.23
Liaoning	2015	237.53	220.008	40.2597	200.16	8058.38
Liaoning	2016	245.84	230.414	10.4058	237.53	2471.69
Liaoning	2017	284.03	271.981	41.5665	245.84	10218.7
Liaoning	2018	316.88	300.208	28.2274	284.03	8017.43
Liaoning	2019	344.11	323.734	23.5255	316.88	7454.76
Liaoning	2020	361.46	341.22	17.4865	344.11	6017.26
Liaoning	2021	379.23	359.162	17.9419	361.46	6485.29
Liaoning	2022	397.91	377.582	18.42	379.23	6985.42
Hebei	2011	32.42	40.0042			0
Hebei	2012	89.32	99.6855	59.6813	32.42	1934.87
Hebei	2013	144.98	155.349	55.6639	89.32	4971.9
Hebei	2014	160.76	179.749	24.3994	144.98	3537.42
Hebei	2015	199.53	220.008	40.2597	160.76	6472.15
Hebei	2016	214.36	230.414	10.4058	199.53	2076.27
Hebei	2017	258.17	271.981	41.5665	214.36	8910.18
Hebei	2018	282.77	300.208	28.2274	258.17	7287.47
Hebei	2019	305.06	323.734	23.5255	282.77	6652.3
Hebei	2020	322.7	341.22	17.4865	305.06	5334.42
Hebei	2021	340.99	359.162	17.9419	322.7	5789.86
Hebei	2022	359.67	377.582	18.42	340.99	6281.04
Tianjin	2011	43.29	40.0042			0
Tianjin	2012	103.53	99.6855	59.6813	43.29	2583.6
Tianjin	2013	160.07	155.349	55.6639	103.53	5762.88
Tianjin	2014	187.61	179.749	24.3994	160.07	3905.6
Tianjin	2015	226.4	220.008	40.2597	187.61	7553.12
Tianjin	2016	231.41	230.414	10.4058	226.4	2355.87
Tianjin	2017	267.18	271.981	41.5665	231.41	9618.89
Tianjin	2018	290.95	300.208	28.2274	267.18	7541.8
Tianjin	2019	311.01	323.734	23.5255	290.95	6844.74
Tianjin	2020	326.29	341.22	17.4865	311.01	5438.46
Tianjin	2021	342.2	359.162	17.9419	326.29	5854.27
Tianjin	2022	358.26	377.582	18.42	342.2	6303.32
Shandong	2011	80.19	40.0042			0
Shandong	2012	150.77	99.6855	59.6813	80.19	4785.84
Shandong	2013	222.14	155.349	55.6639	150.77	8392.44
Shandong	2014	239.53	179.749	24.3994	222.14	5420.07
Shandong	2015	278.11	220.008	40.2597	239.53	9643.4
Shandong	2016	282.22	230.414	10.4058	278.11	2893.96
Shandong	2017	336.65	271.981	41.5665	282.22	11730.9
Shandong	2018	377.73	300.208	28.2274	336.65	9502.76
Shandong	2019	410.28	323.734	23.5255	377.73	8886.28
Shandong	2020	431.93	341.22	17.4865	410.28	7174.34
Shandong	2021	453.75	359.162	17.9419	431.93	7749.66
Shandong	2022	475.79	377.582	18.42	453.75	8358.08
Jiangsu	2011	62.08	40.0042			0
Jiangsu	2012	122.03	99.6855	59.6813	62.08	3705.01
Jiangsu	2013	180.98	155.349	55.6639	122.03	6792.66
Jiangsu	2014	204.16	179.749	24.3994	180.98	4415.8
Jiangsu	2015	244.01	220.008	40.2597	204.16	8219.42
Jiangsu	2016	253.75	230.414	10.4058	244.01	2539.12
Jiangsu	2017	297.69	271.981	41.5665	253.75	10547.5
Jiangsu	2018	334.02	300.208	28.2274	297.69	8403.02
Jiangsu	2019	361.93	323.734	23.5255	334.02	7857.98
Jiangsu	2020	381.61	341.22	17.4865	361.93	6328.87
Jiangsu	2021	401.38	359.162	17.9419	381.61	6846.82
Jiangsu	2022	421.17	377.582	18.42	401.38	7393.42
Shanghai	2011	77.39	40.0042			0
Shanghai	2012	146.35	99.6855	59.6813	77.39	4618.74
Shanghai	2013	205.77	155.349	55.6639	146.35	8146.41
Shanghai	2014	224.45	179.749	24.3994	205.77	5020.66
Shanghai	2015	264.85	220.008	40.2597	224.45	9036.28
Shanghai	2016	268.1	230.414	10.4058	264.85	2755.98
Shanghai	2017	318.05	271.981	41.5665	268.1	11144
Shanghai	2018	357.45	300.208	28.2274	318.05	8977.73
Shanghai	2019	387.49	323.734	23.5255	357.45	8409.18
Shanghai	2020	406.88	341.22	17.4865	387.49	6775.83
Shanghai	2021	426.85	359.162	17.9419	406.88	7300.21
Shanghai	2022	447.19	377.582	18.42	426.85	7862.58
Zhejiang	2011	61.76	40.0042			0
Zhejiang	2012	123.21	99.6855	59.6813	61.76	3685.92
Zhejiang	2013	183.1	155.349	55.6639	123.21	6858.35
Zhejiang	2014	202.59	179.749	24.3994	183.1	4467.52
Zhejiang	2015	245.21	220.008	40.2597	202.59	8156.21
Zhejiang	2016	252.67	230.414	10.4058	245.21	2551.61
Zhejiang	2017	299.28	271.981	41.5665	252.67	10502.6
Zhejiang	2018	334.44	300.208	28.2274	299.28	8447.9
Zhejiang	2019	360.51	323.734	23.5255	334.44	7867.86
Zhejiang	2020	380.13	341.22	17.4865	360.51	6304.04
Zhejiang	2021	400.26	359.162	17.9419	380.13	6820.27
Zhejiang	2022	420.96	377.582	18.42	400.26	7372.79
Fujian	2011	38.55	40.0042			0
Fujian	2012	100.35	99.6855	59.6813	38.55	2300.71
Fujian	2013	159.3	155.349	55.6639	100.35	5585.87
Fujian	2014	181.88	179.749	24.3994	159.3	3886.82
Fujian	2015	220.66	220.008	40.2597	181.88	7322.43
Fujian	2016	232.57	230.414	10.4058	220.66	2296.15
Fujian	2017	272.06	271.981	41.5665	232.57	9667.11
Fujian	2018	301.13	300.208	28.2274	272.06	7679.55
Fujian	2019	327.36	323.734	23.5255	301.13	7084.23
Fujian	2020	347.81	341.22	17.4865	327.36	5724.36
Fujian	2021	368.44	359.162	17.9419	347.81	6240.38
Fujian	2022	389.83	377.582	18.42	368.44	6786.66
Guangdong	2011	69.48	40.0042			0
Guangdong	2012	127.06	99.6855	59.6813	69.48	4146.66
Guangdong	2013	184.78	155.349	55.6639	127.06	7072.65
Guangdong	2014	201.53	179.749	24.3994	184.78	4508.51
Guangdong	2015	240.95	220.008	40.2597	201.53	8113.53
Guangdong	2016	248	230.414	10.4058	240.95	2507.28
Guangdong	2017	296.17	271.981	41.5665	248	10308.5
Guangdong	2018	331.92	300.208	28.2274	296.17	8360.11
Guangdong	2019	360.61	323.734	23.5255	331.92	7808.58
Guangdong	2020	379.53	341.22	17.4865	360.61	6305.79
Guangdong	2021	398.84	359.162	17.9419	379.53	6809.5
Guangdong	2022	418.34	377.582	18.42	398.84	7346.63
Guangxi	2011	33.89	40.0042			0
Guangxi	2012	89.35	99.6855	59.6813	33.89	2022.6
Guangxi	2013	141.46	155.349	55.6639	89.35	4973.57
Guangxi	2014	166.12	179.749	24.3994	141.46	3451.53
Guangxi	2015	207.23	220.008	40.2597	166.12	6687.94
Guangxi	2016	223.32	230.414	10.4058	207.23	2156.4
Guangxi	2017	261.94	271.981	41.5665	223.32	9282.62
Guangxi	2018	289.25	300.208	28.2274	261.94	7393.89
Guangxi	2019	309.91	323.734	23.5255	289.25	6804.75
Guangxi	2020	325.17	341.22	17.4865	309.91	5419.23
Guangxi	2021	340.66	359.162	17.9419	325.17	5834.18
Guangxi	2022	357.15	377.582	18.42	340.66	6274.96
Hainan	2011	45.56	40.0042			0
Hainan	2012	102.94	99.6855	59.6813	45.56	2719.08
Hainan	2013	158.26	155.349	55.6639	102.94	5730.04
Hainan	2014	179.62	179.749	24.3994	158.26	3861.44
Hainan	2015	230.33	220.008	40.2597	179.62	7231.44
Hainan	2016	231.56	230.414	10.4058	230.33	2396.77
Hainan	2017	275.64	271.981	41.5665	231.56	9625.13
Hainan	2018	309.72	300.208	28.2274	275.64	7780.61
Hainan	2019	328.75	323.734	23.5255	309.72	7286.31
Hainan	2020	344.05	341.22	17.4865	328.75	5748.67
Hainan	2021	359.83	359.162	17.9419	344.05	6172.92
Hainan	2022	375.98	377.582	18.42	359.83	6628.07
